# Supplementary material for: The evaluation of matrix effects in pesticide multi-residue methods via matrix fingerprinting using liquid chromatography electrospray high-resolution mass spectrometry
Source: Royal Society of Chemistry journal article supplement (doi:10.1039/c6ay00436a), 2016-01-01

## Electronic Supplementary Information

### Evaluation of matrix effects in pesticide multi-residue methods by matrix fingerprinting using liquid chromatography electrospray high resolution mass spectrometry

María del Mar Gómez-Ramos, Łukasz Rajski, Ana Lozano and Amadeo R. Fernández-Alba\*

*European Union Reference Laboratory for Pesticide Residues in Fruit & Vegetables, University of Almeria, Agrifood Campus of International Excellence (ceiA3), 04120 Almería, Spain*

Corresponding author. Email: [amadeo@ual.es](mailto:amadeo@ual.es)

Table S1. Signal suppression effects of pesticides at different dilution factors in tomato, pepper, grape, cucumber, orange, leek and broccoli

Figure S1. Matrix fingerprinting of the 23 studied matrices analyzed using LC-TOF-MS (absolute height  $\geq 10,000$  counts). The x-axis represents the retention time (min) and the y-axis the mass.

**Table S1. Signal suppression effects of pesticides at different dilution factors in tomato, pepper, grape, cucumber, orange, leek and broccoli**

| Tomato              |                      |                        |                |               |             |
|---------------------|----------------------|------------------------|----------------|---------------|-------------|
| Pesticides          | Retention time (min) | Signal suppression (%) |                |               |             |
|                     |                      | 1: 20 Dilution         | 1: 10 Dilution | 1: 5 Dilution | No Dilution |
| Acephate            | 1.1                  | 15                     | -19            | -21           | -39         |
| Acetamiprid         | 4.5                  | 1                      | -4             | -4            | -2          |
| Aldicarb            | 5.8                  | 3                      | -12            | -6            | -16         |
| Aldicarb sulfone    | 1.8                  | 16                     | 11             | 12            | 23          |
| Aldicarb sulfoxide  | 1.2                  | 13                     | -12            | -23           | -11         |
| Azoxystrobin        | 9.7                  | -12                    | -12            | -11           | -6          |
| Bitertanol          | 10.2                 | -24                    | -20            | -16           | -22         |
| Boscalid            | 9.9                  | -9                     | -11            | -10           | -15         |
| Bromuconazole I     | 9.3                  | -10                    | -11            | -12           | -15         |
| Bromuconazole II    | 9.8                  | -12                    | -14            | -12           | -21         |
| Bupirimate          | 8.4                  | -14                    | -12            | -11           | -17         |
| Buprofezin          | 9.9                  | -23                    | -29            | -21           | -14         |
| Carbaryl            | 7.5                  | 4                      | -13            | -7            | -19         |
| Carbendazim         | 1.2                  | -7                     | -17            | -20           | -28         |
| Carbofuran          | 7.2                  | -13                    | -10            | -19           | -38         |
| Chlorantraniliprole | 8.7                  | -8                     | -13            | -7            | -10         |
| Chlorfenvinphos     | 10.9                 | -15                    | -15            | -12           | -17         |
| Chlorpyrifos        | 13.1                 | -30                    | -23            | -15           | -29         |
| Clofentezine        | 11.5                 | -30                    | -29            | -32           | -33         |
| Clothianidin        | 3.5                  | 7                      | -7             | -14           | -21         |
| Cyproconazole       | 9.1                  | -12                    | -12            | -9            | -8          |
| Cyprodinil          | 7.8                  | -11                    | -18            | -15           | -29         |

| Tomato                    |                      |                        |                |               |             |
|---------------------------|----------------------|------------------------|----------------|---------------|-------------|
| Pesticides                | Retention time (min) | Signal suppression (%) |                |               |             |
|                           |                      | 1: 20 Dilution         | 1: 10 Dilution | 1: 5 Dilution | No Dilution |
| Cyromazine                | 0.9                  | -14                    | -36            | -55           | -84         |
| Demeton-S-methylsulfone   | 2.3                  | 7                      | -9             | 0             | 3           |
| Demeton-S-methylsulfoxide | 1.5                  | 22                     | 0              | 3             | -11         |
| Diazinon                  | 11.4                 | -13                    | -15            | -14           | -19         |
| Dichlorvos                | 6.6                  | -10                    | -12            | -16           | -12         |
| Dicrotophos               | 2                    | 6                      | -10            | -7            | -2          |
| Diethofencarb             | 9.3                  | -22                    | -20            | -13           | -10         |
| Difenoconazole            | 10.9                 | -25                    | -26            | -7            | -23         |
| Diflubenzuron             | 10.2                 | -26                    | -13            | -9            | -25         |
| Dimethoate                | 4.4                  | -3                     | -7             | -7            | -3          |
| Dimethomorph I            | 8.6                  | -5                     | -9             | -10           | -11         |
| Dimethomorph II           | 8.9                  | -14                    | -9             | -11           | -11         |
| Diniconazole              | 10.5                 | -18                    | -19            | -18           | -23         |
| Dodine                    | 8.8                  | -30                    | -65            | -46           | -50         |
| Epoxiconazole             | 9.6                  | -12                    | -11            | -10           | -16         |
| Ethion                    | 13.4                 | -19                    | -25            | -11           | -21         |
| Ethirimol                 | 2.5                  | -8                     | -13            | -11           | -10         |
| Ethoprophos               | 9.8                  | -12                    | -8             | -13           | -10         |
| Etofenprox                | 10.9                 | -19                    | -6             | -13           | -18         |
| Fenamidone                | 9.8                  | -11                    | -12            | -11           | -8          |
| Fenamiphos                | 9.6                  | -22                    | -10            | -7            | -9          |
| Fenamiphos sulfone        | 7                    | -14                    | -7             | -7            | -7          |
| Fenamiphos sulfoxide      | 5.8                  | -11                    | -9             | -10           | -7          |
| Fenarimol                 | 9.4                  | -17                    | -11            | -11           | -12         |
| Fenazaquin                | 12.6                 | -27                    | -18            | -19           | -14         |
| Fenbuconazole             | 10.2                 | -15                    | -23            | -19           | -16         |
| Fenhexamid                | 9.8                  | -14                    | -10            | -12           | -16         |
| Fenoxycarb                | 7.8                  | -10                    | -7             | -4            | -1          |
| Fenpropimorph             | 7.7                  | -10                    | -24            | -13           | -14         |
| Fenpyroximate             | 13.2                 | -19                    | -16            | -13           | 11          |
| Fenthion sulfoxide        | 7.2                  | -8                     | -7             | -8            | -4          |
| Fonicamid                 | 2.9                  | -11                    | -10            | -7            | -8          |
| Fluazifop                 | 9.3                  | -12                    | -1             | -8            | -13         |
| Flufenoxuron              | 13                   | -15                    | -18            | 11            | 15          |
| Fluopyram                 | 10.2                 | -10                    | -11            | -9            | -12         |
| Fluquinconazole           | 9.8                  | -13                    | -13            | -14           | -19         |
| Flusilazole               | 10.1                 | -16                    | -16            | -15           | -15         |
| Flutriafol                | 7.6                  | -7                     | -15            | -9            | -7          |
| Formetanate               | 1.1                  | -15                    | -17            | -25           | -62         |
| Fosthiazate               | 7.6                  | -18                    | -2             | -6            | -12         |

| Tomato               |                      |                        |                |               |             |
|----------------------|----------------------|------------------------|----------------|---------------|-------------|
| Pesticides           | Retention time (min) | Signal suppression (%) |                |               |             |
|                      |                      | 1: 20 Dilution         | 1: 10 Dilution | 1: 5 Dilution | No Dilution |
| Haloxyfop            | 10.4                 | -13                    | -11            | -11           | -11         |
| Hexaconazole         | 10.2                 | -15                    | -19            | -12           | -21         |
| Hexythiazox          | 13.1                 | -16                    | -32            | -22           | -29         |
| Imazalil             | 6.5                  | -6                     | -6             | -8            | -8          |
| Imidacloprid         | 3.9                  | -3                     | -9             | -6            | -6          |
| Indoxacarb           | 12.2                 | -14                    | -13            | -24           | -5          |
| Iprodione            | 10.5                 | -11                    | -1             | -7            | -8          |
| Iprovalicarb         | 9.6                  | -9                     | -11            | -8            | -5          |
| Isocarbofos          | 9.1                  | 7                      | -10            | -11           | -22         |
| Isoprocarb           | 8.3                  | -16                    | -6             | -8            | -7          |
| Isoproturon          | 8.7                  | -11                    | -2             | -7            | -1          |
| Kresoxim-methyl      | 11.1                 | 1                      | -12            | -14           | -12         |
| Linuron              | 9.2                  | -12                    | -9             | -10           | -11         |
| Lufenuron            | 12.6                 | -10                    | -20            | 13            | 15          |
| Malathion            | 10.5                 | -11                    | -1             | -7            | -8          |
| Mandipropamid        | 9.9                  | -19                    | -15            | -16           | -12         |
| Mepanipyryn          | 9.8                  | -10                    | -15            | -15           | -19         |
| Metalaxyl            | 7.8                  | -13                    | -9             | -4            | -2          |
| Metconazole          | 10.3                 | -16                    | -20            | -15           | -20         |
| Methamidophos        | 1.1                  | -7                     | -25            | -39           | -45         |
| Methidathion         | 9.3                  | 2                      | -17            | -4            | -18         |
| Methiocarb           | 9.1                  | -16                    | -4             | -9            | -13         |
| Methiocarb sulfone   | 5.1                  | -3                     | 15             | 12            | -6          |
| Methiocarb sulfoxide | 2.9                  | -1                     | -7             | 13            | -1          |
| Methomyl             | 2.1                  | 14                     | -8             | -10           | -14         |
| Methoxyfenozide      | 10.3                 | -7                     | -12            | -9            | -11         |
| Metobromuron         | 8.2                  | -6                     | -10            | -2            | -10         |
| Monocrotophos        | 1.7                  | 17                     | 20             | 20            | -5          |
| Myclobutanil         | 9.7                  | -10                    | -11            | -7            | -15         |
| Nitenpyram           | 1.6                  | -8                     | -9             | -14           | -33         |
| Omethoate            | 1.2                  | 14                     | 11             | -10           | -12         |
| Oxadixyl             | 6.3                  | -20                    | -25            | -19           | -3          |
| Oxamyl               | 1.7                  | -18                    | 0              | 5             | -15         |
| Oxydemeton-methyl    | 1.5                  | 22                     | 0              | 3             | -11         |
| Paclobutrazol        | 8.9                  | -7                     | -11            | -8            | -9          |
| Penconazole          | 10.2                 | -11                    | -11            | -13           | -21         |
| Pencycuron           | 11.8                 | -20                    | -20            | -23           | -24         |
| Pendimethalin        | 13.1                 | -15                    | -19            | -21           | -27         |
| Phenthoate           | 11.5                 | -19                    | -28            | -22           | -27         |
| Phosalone            | 11.9                 | -12                    | -30            | -17           | -30         |

| Tomato               |                      |                        |                |               |             |
|----------------------|----------------------|------------------------|----------------|---------------|-------------|
| Pesticides           | Retention time (min) | Signal suppression (%) |                |               |             |
|                      |                      | 1: 20 Dilution         | 1: 10 Dilution | 1: 5 Dilution | No Dilution |
| Phosmet              | 9.5                  | -15                    | -6             | -1            | -10         |
| Pirimicarb           | 2.4                  | -13                    | -11            | 8             | -10         |
| Pirimicarb desmethyl | 1.4                  | -6                     | -12            | -18           | -23         |
| Pirimiphos-methyl    | 11.1                 | -18                    | -21            | -17           | -22         |
| Prochloraz           | 8.7                  | -16                    | -18            | -18           | -19         |
| Profenofos           | 12.1                 | -26                    | -29            | -23           | -32         |
| Propamocarb          | 1.1                  | -9                     | -10            | -12           | -61         |
| Propargite           | 13.6                 | -7                     | -17            | -8            | -15         |
| Propiconazole        | 10.5                 | -15                    | -16            | -11           | -21         |
| Propoxur             | 7                    | -3                     | -8             | -9            | -5          |
| Propyzamide          | 9.9                  | -10                    | -7             | -13           | -13         |
| Prothioconazole      | 10.4                 | -37                    | -30            | -58           | -79         |
| Pymetrozine          | 0.9                  | 30                     | 29             | 4             | -50         |
| Pyraclostrobin       | 11.5                 | -30                    | -22            | -15           | -15         |
| Pyridaben            | 13.9                 | -25                    | -15            | -1            | 12          |
| Pyrimethanil         | 6.2                  | -22                    | -17            | -13           | -11         |
| Pyriproxyfen         | 12.7                 | -21                    | -25            | -17           | -26         |
| Quinoxyfen           | 11.7                 | -25                    | -28            | -25           | -30         |
| Rotenone             | 10.4                 | -17                    | -17            | -18           | -25         |
| Spinosyn A           | 8.7                  | -17                    | -24            | -26           | -13         |
| Spinosyn D           | 9.2                  | -17                    | -45            | -33           | -14         |
| Spirodiclofen        | 14.3                 | -24                    | -10            | -1            | -22         |
| Spiromesifen         | 14.2                 | -11                    | -19            | 4             | 29          |
| Spiroxamine          | 7.7                  | -13                    | -16            | -12           | -15         |
| Tebuconazole         | 9.9                  | -14                    | -13            | -14           | -17         |
| Tebufenozide         | 10.9                 | -20                    | -13            | -3            | -17         |
| Tebufenpyrad         | 12.2                 | -33                    | -25            | -25           | -28         |
| Terbuthylazine       | 9                    | -21                    | -12            | -9            | -15         |
| Tetraconazole        | 10                   | -14                    | -13            | -10           | -19         |
| Thiabendazole        | 1.3                  | 0                      | -17            | -14           | -28         |
| Thiacloprid          | 5.6                  | -2                     | -4             | -6            | -4          |
| Thiamethoxam         | 2.5                  | 11                     | -7             | -5            | 7           |
| Thiodicarb           | 6.9                  | -11                    | -11            | -9            | -4          |
| Triadimenol I        | 8.8                  | -26                    | 3              | -11           | -12         |
| Triadimenol II       | 9.1                  | -11                    | -15            | -11           | -13         |
| Triazophos           | 10.5                 | -6                     | -4             | -7            | -13         |
| Trichlorfon          | 3                    | 0                      | -7             | 2             | -2          |
| Trifloxystrobin      | 12.3                 | -25                    | -27            | -22           | -19         |
| Triflumuron          | 11.1                 | -31                    | -30            | -25           | -28         |
| Triticonazole        | 9.1                  | -12                    | -9             | -7            | -12         |

| Tomato     |                      |                        |                |               |             |
|------------|----------------------|------------------------|----------------|---------------|-------------|
| Pesticides | Retention time (min) | Signal suppression (%) |                |               |             |
|            |                      | 1: 20 Dilution         | 1: 10 Dilution | 1: 5 Dilution | No Dilution |
| Zoxamide   | 11.4                 | -16                    | -15            | -12           | -13         |

| Pepper                    |                      |                        |                |               |             |
|---------------------------|----------------------|------------------------|----------------|---------------|-------------|
| Pesticides                | Retention time (min) | Signal suppression (%) |                |               |             |
|                           |                      | 1: 20 Dilution         | 1: 10 Dilution | 1: 5 Dilution | No Dilution |
| Acephate                  | 1.1                  | 2                      | -18            | -16           | -38         |
| Acetamiprid               | 4.5                  | 5                      | 0              | 3             | 5           |
| Aldicarb                  | 5.8                  | 1                      | -13            | -8            | -34         |
| Aldicarb sulfone          | 1.8                  | 28                     | 3              | 12            | 12          |
| Aldicarb sulfoxide        | 1.2                  | 20                     | -9             | -4            | 1           |
| Azoxystrobin              | 9.7                  | -12                    | -13            | -1            | 3           |
| Bitertanol                | 10.2                 | -19                    | -17            | -7            | -9          |
| Boscalid                  | 9.9                  | -6                     | -12            | -4            | -11         |
| Bromuconazole I           | 9.3                  | -7                     | -9             | -8            | -10         |
| Bromuconazole II          | 9.8                  | -8                     | -12            | -8            | -12         |
| Bupirimate                | 8.4                  | -11                    | -9             | -7            | -9          |
| Buprofezin                | 9.9                  | -5                     | -11            | -2            | 1           |
| Carbaryl                  | 7.5                  | 7                      | -21            | -1            | -19         |
| Carbendazim               | 1.2                  | 2                      | -14            | -12           | -23         |
| Carbofuran                | 7.2                  | 13                     | 15             | 15            | -48         |
| Chlorantraniliprole       | 8.7                  | -5                     | -14            | -2            | -3          |
| Chlorfenvinphos           | 10.9                 | -9                     | -9             | -3            | -5          |
| Chlorpyrifos              | 13.1                 | -7                     | -1             | 10            | 0           |
| Clofentezine              | 11.5                 | -11                    | -25            | -10           | -19         |
| Clothianidin              | 3.5                  | 4                      | -7             | -2            | -1          |
| Cyproconazole             | 9.1                  | -9                     | -11            | -4            | -6          |
| Cyprodinil                | 7.8                  | -7                     | -9             | -14           | -25         |
| Cyromazine                | 0.9                  | -15                    | -33            | -43           | -72         |
| Demeton-S-methylsulfone   | 2.3                  | 8                      | -6             | 3             | 4           |
| Demeton-S-methylsulfoxide | 1.5                  | 24                     | 0              | 17            | 9           |
| Diazinon                  | 11.4                 | -9                     | -12            | -5            | -12         |
| Dichlorvos                | 6.6                  | -14                    | -7             | -11           | -8          |
| Dicrotophos               | 2                    | 9                      | -1             | 8             | 8           |
| Diethofencarb             | 9.3                  | -18                    | -14            | -5            | -6          |
| Difenoconazole            | 10.9                 | -15                    | -17            | -10           | -6          |
| Diflubenzuron             | 10.2                 | -2                     | -8             | -4            | -13         |
| Dimethoate                | 4.4                  | 1                      | -3             | 3             | 2           |
| Dimethomorph I            | 8.6                  | -7                     | -9             | -3            | -4          |
| Dimethomorph II           | 8.9                  | -6                     | -9             | -5            | -3          |
| Diniconazole              | 10.5                 | -15                    | -12            | -8            | -10         |
| Dodine                    | 8.8                  | 11                     | -16            | 14            | -6          |
| Epoxiconazole             | 9.6                  | -13                    | -10            | -8            | -10         |

| Pepper               |                      |                        |                |               |             |
|----------------------|----------------------|------------------------|----------------|---------------|-------------|
| Pesticides           | Retention time (min) | Signal suppression (%) |                |               |             |
|                      |                      | 1: 20 Dilution         | 1: 10 Dilution | 1: 5 Dilution | No Dilution |
| Ethion               | 13.4                 | 10                     | 3              | 21            | 12          |
| Ethirimol            | 2.5                  | -3                     | -13            | -6            | -12         |
| Ethoprophos          | 9.8                  | -6                     | -7             | -6            | -6          |
| Etofenprox           | 10.9                 | -13                    | -11            | -5            | -8          |
| Fenamidone           | 9.8                  | -7                     | -9             | -5            | -6          |
| Fenamiphos           | 9.6                  | -23                    | -4             | -7            | -13         |
| Fenamiphos sulfone   | 7                    | -11                    | -5             | 1             | 2           |
| Fenamiphos sulfoxide | 5.8                  | -6                     | -7             | 8             | 17          |
| Fenarimol            | 9.4                  | -15                    | -11            | -6            | -8          |
| Fenazaquin           | 12.6                 | 6                      | 5              | 11            | 10          |
| Fenbuconazole        | 10.2                 | -15                    | -19            | -10           | -12         |
| Fenhexamid           | 9.8                  | -15                    | -6             | -9            | -12         |
| Fenoxycarb           | 7.8                  | -5                     | -4             | 1             | -6          |
| Fenpropimorph        | 7.7                  | -13                    | -19            | -3            | -11         |
| Fenpyroximate        | 13.2                 | 9                      | 21             | 27            | 20          |
| Fenthion sulfoxide   | 7.2                  | -3                     | 9              | 24            | 17          |
| Flonicamid           | 2.9                  | -11                    | -8             | -3            | -6          |
| Fluazifop            | 9.3                  | -10                    | 3              | -5            | -10         |
| Flufenoxuron         | 13                   | 5                      | 2              | 1             | 17          |
| Fluopyram            | 10.2                 | -5                     | -12            | -2            | -4          |
| Fluquinconazole      | 9.8                  | -9                     | -8             | -7            | -13         |
| Flusilazole          | 10.1                 | -14                    | -15            | -5            | -8          |
| Flutriafol           | 7.6                  | 5                      | -9             | -3            | -6          |
| Formetanate          | 1.1                  | -15                    | -15            | -20           | -38         |
| Fosthiazate          | 7.6                  | -11                    | 1              | 1             | -9          |
| Haloxifop            | 10.4                 | -11                    | -11            | -5            | -8          |
| Hexaconazole         | 10.2                 | -10                    | -13            | -5            | -11         |
| Hexythiazox          | 13.1                 | -4                     | -10            | 6             | 2           |
| Imazalil             | 6.5                  | -10                    | -12            | -10           | -14         |
| Imidacloprid         | 3.9                  | -1                     | -6             | 1             | 9           |
| Indoxacarb           | 12.2                 | -8                     | -5             | 3             | 11          |
| Iprodione            | 10.5                 | -11                    | -3             | -1            | -2          |
| Iprovalicarb         | 9.6                  | -17                    | -2             | -1            | -4          |
| Isocarbofos          | 9.1                  | 5                      | -8             | -5            | -21         |
| Isoprocarb           | 8.3                  | -17                    | 2              | 0             | -6          |
| Isoproturon          | 8.7                  | -2                     | -8             | -4            | -6          |
| Kresoxim-methyl      | 11.1                 | -1                     | -12            | -3            | -7          |
| Linuron              | 9.2                  | -9                     | -8             | -3            | -9          |
| Lufenuron            | 12.6                 | -7                     | -8             | -4            | -8          |
| Malathion            | 10.5                 | -11                    | -3             | -1            | -2          |
| Mandipropamid        | 9.9                  | -16                    | -10            | -10           | -4          |
| Mepanipyryn          | 9.8                  | -10                    | -9             | -11           | -13         |
| Metalaxyl            | 7.8                  | -8                     | 0              | 15            | 17          |
| Metconazole          | 10.3                 | -10                    | -16            | -7            | -11         |
| Methamidophos        | 1.1                  | 1                      | -18            | -26           | -36         |
| Methidathion         | 9.3                  | 12                     | -5             | -5            | -16         |

| Pepper               |                      |                        |                |               |             |
|----------------------|----------------------|------------------------|----------------|---------------|-------------|
| Pesticides           | Retention time (min) | Signal suppression (%) |                |               |             |
|                      |                      | 1: 20 Dilution         | 1: 10 Dilution | 1: 5 Dilution | No Dilution |
| Methiocarb           | 9.1                  | -15                    | -3             | -3            | -11         |
| Methiocarb sulfone   | 5.1                  | -13                    | 13             | 16            | -1          |
| Methiocarb sulfoxide | 2.9                  | -2                     | -4             | 14            | 3           |
| Methomyl             | 2.1                  | 12                     | 2              | 10            | -9          |
| Methoxyfenozide      | 10.3                 | -6                     | -8             | -3            | -4          |
| Metobromuron         | 8.2                  | 1                      | -10            | 3             | -7          |
| Monocrotophos        | 1.7                  | 9                      | -5             | 2             | 3           |
| Myclobutanil         | 9.7                  | -11                    | -14            | -5            | -11         |
| Nitenpyram           | 1.6                  | -8                     | -8             | -4            | -16         |
| Omethoate            | 1.2                  | 10                     | 3              | 4             | -20         |
| Oxadixyl             | 6.3                  | -6                     | -5             | 7             | 3           |
| Oxamyl               | 1.7                  | -18                    | 2              | 7             | -6          |
| Oxydemeton-methyl    | 1.5                  | 24                     | 0              | 17            | 9           |
| Paclobutrazol        | 8.9                  | -8                     | -8             | -3            | -7          |
| Penconazole          | 10.2                 | -11                    | -10            | -5            | -10         |
| Pencycuron           | 11.8                 | -12                    | -11            | -3            | -1          |
| Pendimethalin        | 13.1                 | 6                      | -7             | 13            | 8           |
| Phenthoate           | 11.5                 | 0                      | -20            | -6            | -13         |
| Phosalone            | 11.9                 | -1                     | -20            | -9            | -16         |
| Phosmet              | 9.5                  | -16                    | -3             | 13            | -10         |
| Pirimicarb           | 2.4                  | 3                      | -8             | -3            | -12         |
| Pirimicarb desmethyl | 1.4                  | 0                      | -10            | -8            | -17         |
| Pirimiphos-methyl    | 11.1                 | -5                     | -10            | -5            | -8          |
| Prochloraz           | 8.7                  | -9                     | -12            | -10           | -9          |
| Profenofos           | 12.1                 | -11                    | -18            | -8            | -6          |
| Propamocarb          | 1.1                  | -10                    | -12            | -11           | -24         |
| Propargite           | 13.6                 | 18                     | 11             | 31            | 16          |
| Propiconazole        | 10.5                 | -3                     | -11            | -3            | -12         |
| Propoxur             | 7                    | -8                     | -9             | -1            | -5          |
| Propyzamide          | 9.9                  | -9                     | -5             | -8            | -11         |
| Prothioconazole      | 10.4                 | -53                    | -61            | -69           | -85         |
| Pymetrozine          | 0.9                  | 20                     | 15             | 21            | -25         |
| Pyraclostrobin       | 11.5                 | -11                    | 0              | 16            | 19          |
| Pyridaben            | 13.9                 | -1                     | 16             | 39            | 43          |
| Pyrimethanil         | 6.2                  | -13                    | -11            | -11           | -18         |
| Pyriproxyfen         | 12.7                 | 7                      | -1             | 9             | 2           |
| Quinoxifen           | 11.7                 | -5                     | -5             | -1            | -2          |
| Rotenone             | 10.4                 | -16                    | -11            | -9            | -10         |
| Spinosyn A           | 8.7                  | 5                      | -17            | 16            | 15          |
| Spinosyn D           | 9.2                  | 27                     | -9             | 24            | 22          |
| Spirodiclofen        | 14.3                 | -9                     | 23             | 21            | -11         |
| Spiromesifen         | 14.2                 | 2                      | 16             | 10            | 12          |
| Spiroxamine          | 7.7                  | -14                    | -19            | -10           | -16         |
| Tebuconazole         | 9.9                  | -4                     | -12            | -9            | -9          |
| Tebufenozide         | 10.9                 | 42                     | 5              | 1             | -3          |
| Tebufenpyrad         | 12.2                 | -10                    | -13            | -4            | 2           |

| Pepper          |                      |                        |                |               |             |
|-----------------|----------------------|------------------------|----------------|---------------|-------------|
| Pesticides      | Retention time (min) | Signal suppression (%) |                |               |             |
|                 |                      | 1: 20 Dilution         | 1: 10 Dilution | 1: 5 Dilution | No Dilution |
| Terbutylazine   | 9                    | -7                     | -10            | -5            | -13         |
| Tetraconazole   | 10                   | -10                    | -8             | -5            | -12         |
| Thiabendazole   | 1.3                  | 2                      | -16            | -10           | -28         |
| Thiacloprid     | 5.6                  | 3                      | -3             | 3             | 7           |
| Thiamethoxam    | 2.5                  | 7                      | -1             | 5             | 36          |
| Thiodicarb      | 6.9                  | -11                    | -7             | 3             | 16          |
| Triadimenol I   | 8.8                  | 1                      | 5              | -5            | -10         |
| Triadimenol II  | 9.1                  | -8                     | -13            | -6            | -9          |
| Triazophos      | 10.5                 | -2                     | -1             | 2             | -4          |
| Trichlorfon     | 3                    | 5                      | -3             | 12            | 8           |
| Trifloxystrobin | 12.3                 | -7                     | -8             | 0             | 10          |
| Triflumuron     | 11.1                 | -17                    | -16            | -9            | -4          |
| Triticonazole   | 9.1                  | -12                    | -9             | -4            | -8          |
| Zoxamide        | 11.4                 | -7                     | -5             | 5             | 3           |

| Grape               |                      |                        |                |               |             |
|---------------------|----------------------|------------------------|----------------|---------------|-------------|
| Pesticides          | Retention time (min) | Signal suppression (%) |                |               |             |
|                     |                      | 1: 20 Dilution         | 1: 10 Dilution | 1: 5 Dilution | No Dilution |
| Acephate            | 1.1                  | 10                     | 10             | 2             | 1           |
| Acetamiprid         | 4.5                  | -2                     | 7              | 7             | 5           |
| Aldicarb            | 5.8                  | -11                    | -4             | -9            | -22         |
| Aldicarb sulfone    | 1.8                  | -10                    | 4              | 7             | 8           |
| Aldicarb sulfoxide  | 1.2                  | 4                      | 1              | -7            | -3          |
| Azoxystrobin        | 9.7                  | 11                     | 15             | 19            | 11          |
| Bitertanol          | 10.2                 | -7                     | -4             | -7            | -9          |
| Boscalid            | 9.9                  | -8                     | -5             | -1            | -4          |
| Bromuconazole I     | 9.3                  | -9                     | -5             | -3            | -3          |
| Bromuconazole II    | 9.8                  | -11                    | -6             | -4            | -4          |
| Bupirimate          | 8.4                  | -6                     | 0              | -3            | -2          |
| Buprofezin          | 9.9                  | 16                     | 17             | 14            | -7          |
| Carbaryl            | 7.5                  | 1                      | 10             | 13            | -1          |
| Carbendazim         | 1.2                  | 14                     | 7              | 5             | 6           |
| Carbofuran          | 7.2                  | -5                     | 16             | 3             | 43          |
| Chlorantraniliprole | 8.7                  | 2                      | 5              | 2             | 6           |
| Chlorfenvinphos     | 10.9                 | -6                     | 4              | -1            | -2          |
| Chlorpyrifos        | 13.1                 | 19                     | 13             | 27            | 15          |
| Clofentezine        | 11.5                 | -11                    | -4             | -8            | 0           |
| Clothianidin        | 3.5                  | -7                     | -1             | 2             | -2          |



| Grape                     |                      |                        |                |               |             |
|---------------------------|----------------------|------------------------|----------------|---------------|-------------|
| Pesticides                | Retention time (min) | Signal suppression (%) |                |               |             |
|                           |                      | 1: 20 Dilution         | 1: 10 Dilution | 1: 5 Dilution | No Dilution |
| Cyproconazole             | 9.1                  | -15                    | -7             | -2            | 12          |
| Cyprodinil                | 7.8                  | 12                     | 12             | 14            | -30         |
| Cyromazine                | 0.9                  | -12                    | -14            | -17           | 19          |
| Demeton-S-methylsulfone   | 2.3                  | -1                     | 7              | 19            | 32          |
| Demeton-S-methylsulfoxide | 1.5                  | 7                      | 4              | 15            | -4          |
| Diazinon                  | 11.4                 | -15                    | 2              | -8            | 8           |
| Dichlorvos                | 6.6                  | -5                     | 9              | -6            | 31          |
| Dicrotophos               | 2                    | -3                     | 5              | 4             | 3           |
| Diethofencarb             | 9.3                  | -6                     | -4             | 2             | 18          |
| Difenoconazole            | 10.9                 | 7                      | 9              | 2             | -4          |
| Diflubenzuron             | 10.2                 | -5                     | -15            | -7            | 2           |
| Dimethoate                | 4.4                  | -4                     | 0              | 2             | 5           |
| Dimethomorph I            | 8.6                  | -12                    | -3             | 5             | 5           |
| Dimethomorph II           | 8.9                  | -7                     | -2             | -1            | -6          |
| Diniconazole              | 10.5                 | -14                    | -2             | -5            | -54         |
| Dodine                    | 8.8                  | 8                      | 2              | -10           | -5          |
| Epoxiconazole             | 9.6                  | -7                     | -4             | -3            | -10         |
| Ethion                    | 13.4                 | -2                     | 8              | -10           | -3          |
| Ethirimol                 | 2.5                  | -8                     | -4             | -1            | 4           |
| Ethoprophos               | 9.8                  | -10                    | 6              | 6             | -5          |
| Etofenprox                | 10.9                 | 3                      | 4              | 8             | 2           |
| Fenamidone                | 9.8                  | -14                    | -10            | -6            | 1           |
| Fenamiphos                | 9.6                  | 0                      | -1             | 5             | 8           |
| Fenamiphos sulfone        | 7                    | -9                     | -1             | 1             | -2          |
| Fenamiphos sulfoxide      | 5.8                  | -8                     | -5             | 5             | -20         |
| Fenarimol                 | 9.4                  | -14                    | -6             | -4            | -5          |
| Fenazaquin                | 12.6                 | -13                    | 7              | -17           | 11          |
| Fenbuconazole             | 10.2                 | -7                     | -4             | -7            | -17         |
| Fenhexamid                | 9.8                  | 14                     | 17             | 11            | -26         |
| Fenoxycarb                | 7.8                  | -13                    | -5             | -11           | -23         |
| Fenpropimorph             | 7.7                  | -18                    | -3             | -15           | -7          |
| Fenpyroximate             | 13.2                 | -9                     | 11             | -12           | 4           |
| Fenthion sulfoxide        | 7.2                  | -2                     | 9              | 5             | -2          |
| Flonicamid                | 2.9                  | -11                    | -7             | -3            | 25          |
| Fluazifop                 | 9.3                  | -12                    | -2             | -4            | 1           |
| Flufenoxuron              | 13                   | -13                    | 8              | -11           | -3          |
| Fluopyram                 | 10.2                 | -10                    | 5              | -2            | -4          |
| Fluquinconazole           | 9.8                  | -13                    | -4             | 2             | -2          |
| Flusilazole               | 10.1                 | -7                     | -1             | -4            | -39         |
| Flutriafol                | 7.6                  | -13                    | -5             | -5            | 5           |

| Grape                |                      |                        |                |               |             |
|----------------------|----------------------|------------------------|----------------|---------------|-------------|
| Pesticides           | Retention time (min) | Signal suppression (%) |                |               |             |
|                      |                      | 1: 20 Dilution         | 1: 10 Dilution | 1: 5 Dilution | No Dilution |
| Formetanate          | 1.1                  | -18                    | -19            | -12           | -2          |
| Fosthiazate          | 7.6                  | -3                     | 11             | 4             | -8          |
| Haloxypop            | 10.4                 | -6                     | -4             | -4            | -29         |
| Hexaconazole         | 10.2                 | -6                     | -6             | -5            | -3          |
| Hexythiazox          | 13.1                 | 1                      | -6             | -11           | 16          |
| Imazalil             | 6.5                  | -12                    | -4             | -4            | 10          |
| Imidacloprid         | 3.9                  | 12                     | 20             | 14            | 0           |
| Indoxacarb           | 12.2                 | 13                     | 14             | 15            | 1           |
| Iprodione            | 10.5                 | 2                      | 0              | 2             | -10         |
| Iprovalicarb         | 9.6                  | -6                     | 3              | 2             | 0           |
| Isocarbofos          | 9.1                  | -7                     | -7             | -1            | 7           |
| Isoprocarb           | 8.3                  | 3                      | -3             | -2            | -3          |
| Isoproturon          | 8.7                  | 1                      | 0              | 4             | -2          |
| Kresoxim-methyl      | 11.1                 | 17                     | 12             | 11            | 0           |
| Linuron              | 9.2                  | -5                     | -4             | 2             | 34          |
| Lufenuron            | 12.6                 | -10                    | -11            | -12           | -14         |
| Malathion            | 10.5                 | 2                      | 0              | 2             | -2          |
| Mandipropamid        | 9.9                  | -11                    | 7              | 1             | -13         |
| Mepanipyryn          | 9.8                  | 3                      | -4             | -3            | -7          |
| Metalaxyl            | 7.8                  | -9                     | -2             | -2            | -16         |
| Metconazole          | 10.3                 | -10                    | -7             | -7            | -5          |
| Methamidophos        | 1.1                  | -10                    | -5             | -5            | -5          |
| Methidathion         | 9.3                  | -8                     | -4             | -3            | -11         |
| Methiocarb           | 9.1                  | -3                     | 1              | 10            | 4           |
| Methiocarb sulfone   | 5.1                  | 12                     | 14             | 10            | 8           |
| Methiocarb sulfoxide | 2.9                  | 8                      | -1             | 2             | 1           |
| Methomyl             | 2.1                  | -2                     | 6              | -5            | 1           |
| Methoxyfenozide      | 10.3                 | 6                      | 1              | 1             | 0           |
| Metobromuron         | 8.2                  | -1                     | 4              | 5             | 9           |
| Monocrotophos        | 1.7                  | -6                     | 3              | 0             | -3          |
| Myclobutanil         | 9.7                  | 1                      | 1              | 5             | -42         |
| Nitenpyram           | 1.6                  | -10                    | -4             | 1             | -1          |
| Omethoate            | 1.2                  | -10                    | -6             | -7            | 22          |
| Oxadixyl             | 6.3                  | -2                     | 3              | -7            | 15          |
| Oxamyl               | 1.7                  | 3                      | 6              | 18            | -4          |
| Oxydemeton-methyl    | 1.5                  | 0                      | 5              | 12            | 30          |
| Paclobutrazol        | 8.9                  | -14                    | 2              | -3            | -7          |
| Penconazole          | 10.2                 | 13                     | 16             | 16            | -25         |
| Pencycuron           | 11.8                 | -2                     | -2             | -2            | -3          |
| Pendimethalin        | 13.1                 | -8                     | 11             | -7            | -6          |

| Grape                |                      |                        |                |               |             |
|----------------------|----------------------|------------------------|----------------|---------------|-------------|
| Pesticides           | Retention time (min) | Signal suppression (%) |                |               |             |
|                      |                      | 1: 20 Dilution         | 1: 10 Dilution | 1: 5 Dilution | No Dilution |
| Phenthoate           | 11.5                 | -10                    | 3              | -1            | -5          |
| Phosalone            | 11.9                 | -11                    | 10             | -3            | -8          |
| Phosmet              | 9.5                  | 3                      | -7             | 7             | -7          |
| Pirimicarb           | 2.4                  | -4                     | -6             | -6            | -3          |
| Pirimicarb desmethyl | 1.4                  | -10                    | -4             | -1            | -7          |
| Pirimiphos-methyl    | 11.1                 | -17                    | -3             | -5            | -11         |
| Prochloraz           | 8.7                  | -10                    | -4             | -2            | -26         |
| Profenofos           | 12.1                 | -9                     | 2              | -4            | -4          |
| Propamocarb          | 1.1                  | -11                    | -7             | -8            | -1          |
| Propargite           | 13.6                 | -2                     | -1             | 0             | 3           |
| Propiconazole        | 10.5                 | -9                     | -2             | -6            | -3          |
| Propoxur             | 7                    | -1                     | 2              | 3             | -19         |
| Propyzamide          | 9.9                  | -10                    | -5             | -2            | 7           |
| Prothioconazole      | 10.4                 | -9                     | -12            | -13           | 8           |
| Pymetrozine          | 0.9                  | 5                      | 5              | 14            | -20         |
| Pyraclostrobin       | 11.5                 | 16                     | 19             | 11            | 31          |
| Pyridaben            | 13.9                 | -22                    | 30             | -29           | -20         |
| Pyrimethanil         | 6.2                  | 7                      | 14             | 12            | 14          |
| Pyriproxyfen         | 12.7                 | -7                     | -6             | -15           | -5          |
| Quinoxyfen           | 11.7                 | 5                      | 6              | 7             | -22         |
| Rotenone             | 10.4                 | 1                      | -4             | 2             | -41         |
| Spinosyn A           | 8.7                  | -10                    | -13            | -13           | -21         |
| Spinosyn D           | 9.2                  | -14                    | -15            | -23           | 8           |
| Spirodiclofen        | 14.3                 | -1                     | 1              | -29           | -11         |
| Spiromesifen         | 14.2                 | -10                    | 6              | -2            | 7           |
| Spiroxamine          | 7.7                  | -8                     | -2             | -6            | -7          |
| Tebuconazole         | 9.9                  | 9                      | 1              | 2             | -7          |
| Tebufenozide         | 10.9                 | -1                     | 3              | -7            | -3          |
| Tebufenpyrad         | 12.2                 | -8                     | 12             | -8            | 0           |
| Terbuthylazine       | 9                    | -12                    | 4              | -3            | -17         |
| Tetraconazole        | 10                   | -14                    | 4              | -3            | 2           |
| Thiabendazole        | 1.3                  | -9                     | -8             | -5            | 12          |
| Thiacloprid          | 5.6                  | -4                     | 1              | 9             | 0           |
| Thiamethoxam         | 2.5                  | 0                      | 0              | 13            | 24          |
| Thiodicarb           | 6.9                  | -5                     | 2              | 4             | 1           |
| Triadimenol I        | 8.8                  | 5                      | 2              | 1             | -2          |
| Triadimenol II       | 9.1                  | 11                     | 11             | 8             | -7          |
| Triazophos           | 10.5                 | 3                      | -1             | 1             | 10          |
| Trichlorfon          | 3                    | 7                      | -9             | 23            | -8          |
| Trifloxystrobin      | 12.3                 | -14                    | 3              | -5            | -1          |

| <b>Grape</b>         |                             |                               |                       |                      |                    |
|----------------------|-----------------------------|-------------------------------|-----------------------|----------------------|--------------------|
| <b>Pesticides</b>    | <b>Retention time (min)</b> | <b>Signal suppression (%)</b> |                       |                      |                    |
|                      |                             | <b>1: 20 Dilution</b>         | <b>1: 10 Dilution</b> | <b>1: 5 Dilution</b> | <b>No Dilution</b> |
| <b>Triflumuron</b>   | <b>11.1</b>                 | -12                           | 6                     | -6                   | -15                |
| <b>Triticonazole</b> | <b>9.1</b>                  | -8                            | -5                    | -5                   | -3                 |
| <b>Zoxamide</b>      | <b>11.4</b>                 | -3                            | -7                    | -9                   | -6                 |

| <b>Cucumber</b>                  |                             |                               |                       |                      |                    |
|----------------------------------|-----------------------------|-------------------------------|-----------------------|----------------------|--------------------|
| <b>Pesticides</b>                | <b>Retention time (min)</b> | <b>Signal suppression (%)</b> |                       |                      |                    |
|                                  |                             | <b>1: 20 Dilution</b>         | <b>1: 10 Dilution</b> | <b>1: 5 Dilution</b> | <b>No Dilution</b> |
| <b>Acephate</b>                  | <b>1.1</b>                  | -11                           | -11                   | -12                  | -20                |
| <b>Acetamiprid</b>               | <b>4.5</b>                  | 0                             | -6                    | 15                   | 27                 |
| <b>Aldicarb</b>                  | <b>5.8</b>                  | -3                            | -12                   | -13                  | -35                |
| <b>Aldicarb sulfone</b>          | <b>1.8</b>                  | -10                           | -6                    | 14                   | 5                  |
| <b>Aldicarb sulfoxide</b>        | <b>1.2</b>                  | 10                            | 5                     | 20                   | 2                  |
| <b>Azoxystrobin</b>              | <b>9.7</b>                  | -3                            | -3                    | 10                   | 5                  |
| <b>Bitertanol</b>                | <b>10.2</b>                 | -2                            | -8                    | 3                    | -11                |
| <b>Boscalid</b>                  | <b>9.9</b>                  | -9                            | -17                   | -9                   | -21                |
| <b>Bromuconazole I</b>           | <b>9.3</b>                  | -7                            | -10                   | 1                    | -15                |
| <b>Bromuconazole II</b>          | <b>9.8</b>                  | -9                            | -13                   | 1                    | -15                |
| <b>Bupirimate</b>                | <b>8.4</b>                  | -9                            | -11                   | -5                   | -22                |
| <b>Buprofezin</b>                | <b>9.9</b>                  | -6                            | -11                   | -2                   | -4                 |
| <b>Carbaryl</b>                  | <b>7.5</b>                  | 25                            | 14                    | 15                   | -25                |
| <b>Carbendazim</b>               | <b>1.2</b>                  | -3                            | -15                   | -10                  | -30                |
| <b>Carbofuran</b>                | <b>7.2</b>                  | -4                            | 6                     | 5                    | 12                 |
| <b>Chlorantraniliprole</b>       | <b>8.7</b>                  | 8                             | 5                     | 4                    | -4                 |
| <b>Chlorfenvinphos</b>           | <b>10.9</b>                 | -3                            | -5                    | 9                    | -5                 |
| <b>Chlorpyrifos</b>              | <b>13.1</b>                 | -18                           | -11                   | -12                  | -35                |
| <b>Clofentezine</b>              | <b>11.5</b>                 | 9                             | -10                   | -7                   | -39                |
| <b>Clothianidin</b>              | <b>3.5</b>                  | -3                            | -7                    | 0                    | -3                 |
| <b>Cyproconazole</b>             | <b>9.1</b>                  | -6                            | -10                   | 1                    | -11                |
| <b>Cyprodinil</b>                | <b>7.8</b>                  | -7                            | -16                   | -14                  | -38                |
| <b>Cyromazine</b>                | <b>0.9</b>                  | -4                            | -27                   | -32                  | -56                |
| <b>Demeton-S-methylsulfone</b>   | <b>2.3</b>                  | -1                            | -6                    | 17                   | 17                 |
| <b>Demeton-S-methylsulfoxide</b> | <b>1.5</b>                  | 4                             | 1                     | 23                   | 25                 |

| <b>Cucumber</b>      |                             |                               |                       |                      |                    |
|----------------------|-----------------------------|-------------------------------|-----------------------|----------------------|--------------------|
| <b>Pesticides</b>    | <b>Retention time (min)</b> | <b>Signal suppression (%)</b> |                       |                      |                    |
|                      |                             | <b>1: 20 Dilution</b>         | <b>1: 10 Dilution</b> | <b>1: 5 Dilution</b> | <b>No Dilution</b> |
| Diazinon             | 11.4                        | -10                           | -10                   | -7                   | -23                |
| Dichlorvos           | 6.6                         | -29                           | 2                     | -32                  | -3                 |
| Dicrotophos          | 2                           | -3                            | -8                    | 6                    | 0                  |
| Diethofencarb        | 9.3                         | -6                            | -10                   | 3                    | -27                |
| Difenoconazole       | 10.9                        | -6                            | -18                   | -2                   | -17                |
| Diflubenzuron        | 10.2                        | 2                             | -23                   | -9                   | -25                |
| Dimethoate           | 4.4                         | -4                            | -11                   | 5                    | 6                  |
| Dimethomorph I       | 8.6                         | -7                            | -11                   | 11                   | 10                 |
| Dimethomorph II      | 8.9                         | -8                            | -10                   | 6                    | 14                 |
| Diniconazole         | 10.5                        | -7                            | -11                   | -1                   | -18                |
| Dodine               | 8.8                         | -9                            | -10                   | -37                  | -30                |
| Epoxiconazole        | 9.6                         | -5                            | -9                    | 1                    | -10                |
| Ethion               | 13.4                        | -7                            | -18                   | -23                  | -37                |
| Ethirimol            | 2.5                         | -5                            | -11                   | -3                   | -3                 |
| Ethoprophos          | 9.8                         | -14                           | -9                    | 1                    | -12                |
| Etofenprox           | 10.9                        | 1                             | -1                    | 6                    | 0                  |
| Fenamidone           | 9.8                         | -7                            | -17                   | -5                   | -16                |
| Fenamiphos           | 9.6                         | 5                             | -1                    | 24                   | 19                 |
| Fenamiphos sulfone   | 7                           | -3                            | -6                    | 11                   | 18                 |
| Fenamiphos sulfoxide | 5.8                         | 1                             | -11                   | 6                    | 28                 |
| Fenarimol            | 9.4                         | -10                           | -13                   | -2                   | -8                 |
| Fenazaquin           | 12.6                        | -7                            | -8                    | -10                  | -18                |
| Fenbuconazole        | 10.2                        | -3                            | -11                   | -2                   | -7                 |
| Fenhexamid           | 9.8                         | -13                           | -16                   | -3                   | -16                |
| Fenoxycarb           | 7.8                         | -6                            | -11                   | -7                   | -11                |
| Fenpropimorph        | 7.7                         | -17                           | -16                   | -15                  | -15                |
| Fenpyroximate        | 13.2                        | -11                           | -14                   | -10                  | -21                |
| Fenthion sulfoxide   | 7.2                         | 0                             | 11                    | 31                   | 14                 |
| Flonicamid           | 2.9                         | 10                            | 19                    | 13                   | 17                 |
| Fluazifop            | 9.3                         | -2                            | -9                    | -1                   | -5                 |
| Flufenoxuron         | 13                          | 6                             | 7                     | -12                  | 15                 |
| Fluopyram            | 10.2                        | -5                            | -5                    | -3                   | -15                |
| Fluquinconazole      | 9.8                         | -8                            | -18                   | -4                   | -18                |
| Flusilazole          | 10.1                        | -1                            | -12                   | 0                    | -12                |
| Flutriafol           | 7.6                         | -2                            | -4                    | -2                   | -5                 |
| Formetanate          | 1.1                         | -3                            | -19                   | -22                  | -26                |
| Fosthiazate          | 7.6                         | -3                            | 8                     | 16                   | 22                 |
| Haloxifop            | 10.4                        | -4                            | -16                   | -7                   | -14                |
| Hexaconazole         | 10.2                        | -2                            | -8                    | -1                   | -12                |
| Hexythiazox          | 13.1                        | -7                            | -8                    | -13                  | -39                |

| <b>Cucumber</b>             |                             |                               |                       |                      |                    |
|-----------------------------|-----------------------------|-------------------------------|-----------------------|----------------------|--------------------|
| <b>Pesticides</b>           | <b>Retention time (min)</b> | <b>Signal suppression (%)</b> |                       |                      |                    |
|                             |                             | <b>1: 20 Dilution</b>         | <b>1: 10 Dilution</b> | <b>1: 5 Dilution</b> | <b>No Dilution</b> |
| <b>Imazalil</b>             | <b>6.5</b>                  | <b>-11</b>                    | <b>-18</b>            | <b>-5</b>            | <b>-4</b>          |
| <b>Imidacloprid</b>         | <b>3.9</b>                  | <b>-4</b>                     | <b>-6</b>             | <b>4</b>             | <b>10</b>          |
| <b>Indoxacarb</b>           | <b>12.2</b>                 | <b>-9</b>                     | <b>17</b>             | <b>-15</b>           | <b>-15</b>         |
| <b>Iprodione</b>            | <b>10.5</b>                 | <b>-2</b>                     | <b>-6</b>             | <b>2</b>             | <b>-17</b>         |
| <b>Iprovalicarb</b>         | <b>9.6</b>                  | <b>-1</b>                     | <b>-2</b>             | <b>12</b>            | <b>-1</b>          |
| <b>Isocarbofos</b>          | <b>9.1</b>                  | <b>-27</b>                    | <b>-52</b>            | <b>-58</b>           | <b>-83</b>         |
| <b>Isoprocarb</b>           | <b>8.3</b>                  | <b>0</b>                      | <b>-8</b>             | <b>-6</b>            | <b>-19</b>         |
| <b>Isoproturon</b>          | <b>8.7</b>                  | <b>-3</b>                     | <b>-7</b>             | <b>-3</b>            | <b>-8</b>          |
| <b>Kresoxim-methyl</b>      | <b>11.1</b>                 | <b>2</b>                      | <b>-12</b>            | <b>-12</b>           | <b>-43</b>         |
| <b>Linuron</b>              | <b>9.2</b>                  | <b>-3</b>                     | <b>-19</b>            | <b>-7</b>            | <b>-23</b>         |
| <b>Lufenuron</b>            | <b>12.6</b>                 | <b>4</b>                      | <b>7</b>              | <b>-1</b>            | <b>-3</b>          |
| <b>Malathion</b>            | <b>10.5</b>                 | <b>-2</b>                     | <b>-6</b>             | <b>2</b>             | <b>-16</b>         |
| <b>Mandipropamid</b>        | <b>9.9</b>                  | <b>-8</b>                     | <b>1</b>              | <b>3</b>             | <b>-14</b>         |
| <b>Mepanipyrim</b>          | <b>9.8</b>                  | <b>-1</b>                     | <b>-13</b>            | <b>-9</b>            | <b>-31</b>         |
| <b>Metalaxyl</b>            | <b>7.8</b>                  | <b>-2</b>                     | <b>2</b>              | <b>18</b>            | <b>16</b>          |
| <b>Metconazole</b>          | <b>10.3</b>                 | <b>-6</b>                     | <b>-16</b>            | <b>-2</b>            | <b>-14</b>         |
| <b>Methamidophos</b>        | <b>1.1</b>                  | <b>0</b>                      | <b>-4</b>             | <b>1</b>             | <b>-14</b>         |
| <b>Methidathion</b>         | <b>9.3</b>                  | <b>-23</b>                    | <b>-38</b>            | <b>-48</b>           | <b>-71</b>         |
| <b>Methiocarb</b>           | <b>9.1</b>                  | <b>-4</b>                     | <b>-8</b>             | <b>-6</b>            | <b>-45</b>         |
| <b>Methiocarb sulfone</b>   | <b>5.1</b>                  | <b>4</b>                      | <b>-6</b>             | <b>8</b>             | <b>12</b>          |
| <b>Methiocarb sulfoxide</b> | <b>2.9</b>                  | <b>11</b>                     | <b>-13</b>            | <b>18</b>            | <b>12</b>          |
| <b>Methomyl</b>             | <b>2.1</b>                  | <b>-3</b>                     | <b>-4</b>             | <b>6</b>             | <b>-13</b>         |
| <b>Methoxyfenozide</b>      | <b>10.3</b>                 | <b>-7</b>                     | <b>0</b>              | <b>5</b>             | <b>-7</b>          |
| <b>Metobromuron</b>         | <b>8.2</b>                  | <b>-7</b>                     | <b>-9</b>             | <b>0</b>             | <b>-23</b>         |
| <b>Monocrotophos</b>        | <b>1.7</b>                  | <b>-4</b>                     | <b>-5</b>             | <b>20</b>            | <b>9</b>           |
| <b>Myclobutanil</b>         | <b>9.7</b>                  | <b>-7</b>                     | <b>-1</b>             | <b>-3</b>            | <b>-6</b>          |
| <b>Nitenpyram</b>           | <b>1.6</b>                  | <b>-4</b>                     | <b>-11</b>            | <b>-3</b>            | <b>-19</b>         |
| <b>Omethoate</b>            | <b>1.2</b>                  | <b>-9</b>                     | <b>-3</b>             | <b>16</b>            | <b>-8</b>          |
| <b>Oxadixyl</b>             | <b>6.3</b>                  | <b>2</b>                      | <b>5</b>              | <b>8</b>             | <b>17</b>          |
| <b>Oxamyl</b>               | <b>1.7</b>                  | <b>1</b>                      | <b>-2</b>             | <b>21</b>            | <b>13</b>          |
| <b>Oxydemeton-methyl</b>    | <b>1.5</b>                  | <b>1</b>                      | <b>5</b>              | <b>27</b>            | <b>15</b>          |
| <b>Paclobutrazol</b>        | <b>8.9</b>                  | <b>-3</b>                     | <b>-10</b>            | <b>2</b>             | <b>-6</b>          |
| <b>Penconazole</b>          | <b>10.2</b>                 | <b>-2</b>                     | <b>-9</b>             | <b>-4</b>            | <b>-16</b>         |
| <b>Pencycuron</b>           | <b>11.8</b>                 | <b>-3</b>                     | <b>-22</b>            | <b>-4</b>            | <b>-29</b>         |
| <b>Pendimethalin</b>        | <b>13.1</b>                 | <b>-5</b>                     | <b>-10</b>            | <b>-11</b>           | <b>-32</b>         |
| <b>Phenthoate</b>           | <b>11.5</b>                 | <b>-5</b>                     | <b>-22</b>            | <b>-7</b>            | <b>-34</b>         |
| <b>Phosalone</b>            | <b>11.9</b>                 | <b>-14</b>                    | <b>-16</b>            | <b>-12</b>           | <b>-34</b>         |
| <b>Phosmet</b>              | <b>9.5</b>                  | <b>12</b>                     | <b>-19</b>            | <b>19</b>            | <b>-27</b>         |
| <b>Pirimicarb</b>           | <b>2.4</b>                  | <b>6</b>                      | <b>-1</b>             | <b>3</b>             | <b>7</b>           |
| <b>Pirimicarb desmethyl</b> | <b>1.4</b>                  | <b>-3</b>                     | <b>-6</b>             | <b>1</b>             | <b>-12</b>         |

| <b>Cucumber</b>   |                             |                               |                       |                      |                    |
|-------------------|-----------------------------|-------------------------------|-----------------------|----------------------|--------------------|
| <b>Pesticides</b> | <b>Retention time (min)</b> | <b>Signal suppression (%)</b> |                       |                      |                    |
|                   |                             | <b>1: 20 Dilution</b>         | <b>1: 10 Dilution</b> | <b>1: 5 Dilution</b> | <b>No Dilution</b> |
| Pirimiphos-methyl | 11.1                        | -11                           | -12                   | -14                  | -38                |
| Prochloraz        | 8.7                         | -1                            | -13                   | 2                    | -17                |
| Profenofos        | 12.1                        | -7                            | -36                   | -7                   | -35                |
| Propamocarb       | 1.1                         | -6                            | -11                   | -8                   | -30                |
| Propargite        | 13.6                        | 5                             | 7                     | -6                   | -3                 |
| Propiconazole     | 10.5                        | -8                            | -10                   | -4                   | -18                |
| Propoxur          | 7                           | 0                             | -7                    | 6                    | -10                |
| Propyzamide       | 9.9                         | -10                           | -17                   | -5                   | -18                |
| Prothioconazole   | 10.4                        | -22                           | -22                   | -42                  | -78                |
| Pymetrozine       | 0.9                         | -7                            | 39                    | -13                  | -26                |
| Pyraclostrobin    | 11.5                        | -1                            | -16                   | 0                    | -31                |
| Pyridaben         | 13.9                        | -7                            | -18                   | -14                  | -31                |
| Pyrimethanil      | 6.2                         | -2                            | 0                     | 8                    | -13                |
| Pyriproxyfen      | 12.7                        | -7                            | -12                   | -14                  | -27                |
| Quinoxifen        | 11.7                        | -3                            | -11                   | -11                  | -30                |
| Rotenone          | 10.4                        | -5                            | -13                   | 1                    | -18                |
| Spinosyn A        | 8.7                         | -20                           | -17                   | -23                  | -28                |
| Spinosyn D        | 9.2                         | -27                           | -28                   | -40                  | -61                |
| Spirodiclofen     | 14.3                        | -7                            | -31                   | -17                  | -21                |
| Spiromesifen      | 14.2                        | -11                           | 46                    | -14                  | 8                  |
| Spiroxamine       | 7.7                         | -7                            | -39                   | -19                  | -11                |
| Tebuconazole      | 9.9                         | -4                            | -13                   | -2                   | -8                 |
| Tebufenozide      | 10.9                        | 14                            | 0                     | 2                    | -25                |
| Tebufenpyrad      | 12.2                        | -4                            | -34                   | -13                  | -21                |
| Terbuthylazine    | 9                           | -7                            | -19                   | -11                  | -44                |
| Tetraconazole     | 10                          | -8                            | -4                    | -2                   | -11                |
| Thiabendazole     | 1.3                         | -10                           | -15                   | -8                   | -37                |
| Thiacloprid       | 5.6                         | -6                            | -12                   | 8                    | 10                 |
| Thiamethoxam      | 2.5                         | 3                             | -12                   | 7                    | 4                  |
| Thiodicarb        | 6.9                         | 8                             | 9                     | 34                   | 21                 |
| Triadimenol I     | 8.8                         | -5                            | -11                   | -2                   | -4                 |
| Triadimenol II    | 9.1                         | 4                             | -11                   | -2                   | -17                |
| Triazophos        | 10.5                        | -4                            | -9                    | 5                    | -13                |
| Trichlorfon       | 3                           | 7                             | -13                   | 6                    | 10                 |
| Trifloxystrobin   | 12.3                        | -1                            | 4                     | -11                  | -19                |
| Triflumuron       | 11.1                        | -13                           | -16                   | -8                   | -28                |
| Triticonazole     | 9.1                         | -4                            | -16                   | -4                   | -21                |
| Zoxamide          | 11.4                        | -6                            | -18                   | -10                  | -31                |

| Orange                    |                      |                        |                |               |             |
|---------------------------|----------------------|------------------------|----------------|---------------|-------------|
| Pesticides                | Retention time (min) | Signal suppression (%) |                |               |             |
|                           |                      | 1: 20 Dilution         | 1: 10 Dilution | 1: 5 Dilution | No Dilution |
| Acephate                  | 1.1                  | 8                      | -16            | -24           | -55         |
| Acetamiprid               | 4.5                  | 13                     | -5             | 15            | -15         |
| Aldicarb                  | 5.8                  | -13                    | -18            | -18           | -62         |
| Aldicarb sulfone          | 1.8                  | 38                     | 22             | 38            | 17          |
| Aldicarb sulfoxide        | 1.2                  | 30                     | 6              | 13            | -2          |
| Azoxystrobin              | 9.7                  | -18                    | -20            | -11           | -5          |
| Bitertanol                | 10.2                 | -21                    | -24            | -17           | -33         |
| Boscalid                  | 9.9                  | -15                    | -18            | -13           | -22         |
| Bromuconazole I           | 9.3                  | -14                    | -16            | -13           | -26         |
| Bromuconazole II          | 9.8                  | -8                     | -19            | -13           | -30         |
| Bupirimate                | 8.4                  | -42                    | -53            | -59           | -78         |
| Buprofezin                | 9.9                  | -10                    | -19            | -9            | -5          |
| Carbaryl                  | 7.5                  | -7                     | -18            | -9            | -38         |
| Carbendazim               | 1.2                  | -5                     | -22            | -19           | -31         |
| Carbofuran                | 7.2                  | -6                     | -9             | -50           | -63         |
| Chlorantraniliprole       | 8.7                  | -11                    | -24            | -17           | -28         |
| Chlorfenvinphos           | 10.9                 | -15                    | -18            | -11           | -23         |
| Chlorpyrifos              | 13.1                 | -13                    | -25            | -20           | -66         |
| Clofentezine              | 11.5                 | -28                    | -31            | -31           | -62         |
| Clothianidin              | 3.5                  | 21                     | 4              | -1            | -24         |
| Cyproconazole             | 9.1                  | -12                    | -18            | -11           | -13         |
| Cyprodinil                | 7.8                  | -9                     | -24            | -32           | -62         |
| Cyromazine                | 0.9                  | 12                     | 15             | 22            | 1           |
| Demeton-S-methylsulfone   | 2.3                  | 6                      | -4             | 19            | 19          |
| Demeton-S-methylsulfoxide | 1.5                  | 11                     | 14             | 17            | 5           |
| Diazinon                  | 11.4                 | -15                    | -18            | -16           | -33         |
| Dichlorvos                | 6.6                  | -11                    | -11            | -18           | -16         |
| Dicrotophos               | 2                    | -4                     | -15            | -4            | 7           |
| Diethofencarb             | 9.3                  | -19                    | -20            | -12           | -20         |
| Difenoconazole            | 10.9                 | -34                    | -28            | -23           | -45         |
| Diflubenzuron             | 10.2                 | -39                    | -18            | -13           | -46         |
| Dimethoate                | 4.4                  | 5                      | -6             | 9             | -29         |
| Dimethomorph I            | 8.6                  | -10                    | -18            | -12           | -10         |
| Dimethomorph II           | 8.9                  | -25                    | -24            | -30           | -62         |
| Diniconazole              | 10.5                 | -20                    | -24            | -18           | -36         |
| Dodine                    | 8.8                  | -100                   | -100           | -100          | -93         |
| Epoxiconazole             | 9.6                  | -13                    | -17            | -16           | -27         |
| Ethion                    | 13.4                 | -11                    | -18            | -16           | -63         |
| Ethirimol                 | 2.5                  | -13                    | -20            | -14           | -13         |
| Ethoprophos               | 9.8                  | -11                    | -12            | -15           | -13         |



| Orange               |                      |                        |                |               |             |
|----------------------|----------------------|------------------------|----------------|---------------|-------------|
| Pesticides           | Retention time (min) | Signal suppression (%) |                |               |             |
|                      |                      | 1: 20 Dilution         | 1: 10 Dilution | 1: 5 Dilution | No Dilution |
| Etofenprox           | 10.9                 | -100                   | -27            | -16           | -25         |
| Fenamidone           | 9.8                  | -16                    | -13            | -12           | -16         |
| Fenamiphos           | 9.6                  | -21                    | -11            | -10           | -23         |
| Fenamiphos sulfone   | 7                    | -12                    | -10            | -1            | -3          |
| Fenamiphos sulfoxide | 5.8                  | -6                     | -15            | 1             | 22          |
| Fenarimol            | 9.4                  | -15                    | -17            | -14           | -24         |
| Fenazaquin           | 12.6                 | -29                    | -20            | -27           | -58         |
| Fenbuconazole        | 10.2                 | -45                    | -27            | -20           | -23         |
| Fenhexamid           | 9.8                  | -13                    | -14            | -16           | -24         |
| Fenoxycarb           | 7.8                  | -16                    | -18            | -16           | -35         |
| Fenpropimorph        | 7.7                  | -41                    | -60            | -66           | -87         |
| Fenpyroximate        | 13.2                 | -12                    | -11            | -12           | -43         |
| Fenthion sulfoxide   | 7.2                  | -8                     | -10            | -6            | -10         |
| Flonicamid           | 2.9                  | -16                    | -13            | -8            | -8          |
| Fluazifop            | 9.3                  | -13                    | -12            | -10           | -16         |
| Flufenoxuron         | 13                   | -19                    | -17            | 7             | -28         |
| Fluopyram            | 10.2                 | -12                    | -16            | -9            | -16         |
| Fluquinconazole      | 9.8                  | -18                    | -18            | -17           | -31         |
| Flusilazole          | 10.1                 | -16                    | -21            | -15           | -27         |
| Flutriafol           | 7.6                  | -24                    | -35            | -50           | -65         |
| Formetanate          | 1.1                  | -8                     | -20            | -14           | -31         |
| Fosthiazate          | 7.6                  | -49                    | -52            | -59           | -76         |
| Haloxifop            | 10.4                 | -17                    | -17            | -12           | -21         |
| Hexaconazole         | 10.2                 | -14                    | -18            | -15           | -29         |
| Hexythiazox          | 13.1                 | -13                    | -29            | -25           | -67         |
| Imazalil             | 6.5                  | -10                    | -13            | -13           | -17         |
| Imidacloprid         | 3.9                  | -2                     | -8             | 3             | 28          |
| Indoxacarb           | 12.2                 | -25                    | -24            | -21           | -50         |
| Iprodione            | 10.5                 | -13                    | -8             | -6            | -12         |
| Iprovalicarb         | 9.6                  | -20                    | -19            | -11           | -24         |
| Isocarbofos          | 9.1                  | -1                     | -26            | -28           | -64         |
| Isoprocarb           | 8.3                  | -40                    | -50            | -60           | -75         |
| Isoproturon          | 8.7                  | -56                    | -63            | -72           | -89         |
| Kresoxim-methyl      | 11.1                 | -12                    | -19            | -17           | -32         |
| Linuron              | 9.2                  | -11                    | -14            | -13           | -27         |
| Lufenuron            | 12.6                 | -20                    | -8             | 11            | -18         |
| Malathion            | 10.5                 | -13                    | -8             | -6            | -12         |
| Mandipropamid        | 9.9                  | -18                    | -21            | -17           | -18         |
| Mepanipyrim          | 9.8                  | -12                    | -20            | -21           | -44         |
| Metalaxyl            | 7.8                  | -10                    | -11            | 0             | -2          |

| <b>Orange</b>               |                             |                               |                       |                      |                    |
|-----------------------------|-----------------------------|-------------------------------|-----------------------|----------------------|--------------------|
| <b>Pesticides</b>           | <b>Retention time (min)</b> | <b>Signal suppression (%)</b> |                       |                      |                    |
|                             |                             | <b>1: 20 Dilution</b>         | <b>1: 10 Dilution</b> | <b>1: 5 Dilution</b> | <b>No Dilution</b> |
| <b>Metconazole</b>          | <b>10.3</b>                 | -18                           | -23                   | -16                  | -30                |
| <b>Methamidophos</b>        | <b>1.1</b>                  | 0                             | -25                   | -35                  | -46                |
| <b>Methidathion</b>         | <b>9.3</b>                  | -2                            | -23                   | -20                  | -55                |
| <b>Methiocarb</b>           | <b>9.1</b>                  | -20                           | -9                    | -14                  | -34                |
| <b>Methiocarb sulfone</b>   | <b>5.1</b>                  | 0                             | 16                    | 12                   | -25                |
| <b>Methiocarb sulfoxide</b> | <b>2.9</b>                  | -4                            | -13                   | 27                   | 17                 |
| <b>Methomyl</b>             | <b>2.1</b>                  | 10                            | -6                    | 2                    | -5                 |
| <b>Methoxyfenozide</b>      | <b>10.3</b>                 | -16                           | -19                   | -12                  | -16                |
| <b>Metobromuron</b>         | <b>8.2</b>                  | -12                           | -25                   | -25                  | -50                |
| <b>Monocrotophos</b>        | <b>1.7</b>                  | 7                             | -2                    | 16                   | 7                  |
| <b>Myclobutanil</b>         | <b>9.7</b>                  | -13                           | -15                   | -11                  | -18                |
| <b>Nitenpyram</b>           | <b>1.6</b>                  | -10                           | -14                   | -15                  | -47                |
| <b>Omethoate</b>            | <b>1.2</b>                  | 18                            | 23                    | 26                   | -7                 |
| <b>Oxadixyl</b>             | <b>6.3</b>                  | -19                           | -10                   | -16                  | -16                |
| <b>Oxamyl</b>               | <b>1.7</b>                  | -26                           | -3                    | -4                   | -37                |
| <b>Oxydemeton-methyl</b>    | <b>1.5</b>                  | 21                            | 34                    | 27                   | 5                  |
| <b>Paclobutrazol</b>        | <b>8.9</b>                  | -12                           | -19                   | -18                  | -30                |
| <b>Penconazole</b>          | <b>10.2</b>                 | -13                           | -14                   | -12                  | -29                |
| <b>Pencycuron</b>           | <b>11.8</b>                 | -28                           | -23                   | -24                  | -55                |
| <b>Pendimethalin</b>        | <b>13.1</b>                 | -6                            | -22                   | -21                  | -65                |
| <b>Phenthoate</b>           | <b>11.5</b>                 | -12                           | -29                   | -18                  | -51                |
| <b>Phosalone</b>            | <b>11.9</b>                 | -9                            | -29                   | -23                  | -63                |
| <b>Phosmet</b>              | <b>9.5</b>                  | -27                           | -10                   | -7                   | -41                |
| <b>Pirimicarb</b>           | <b>2.4</b>                  | -24                           | -22                   | -16                  | -19                |
| <b>Pirimicarb desmethyl</b> | <b>1.4</b>                  | -9                            | -17                   | -19                  | -29                |
| <b>Pirimiphos-methyl</b>    | <b>11.1</b>                 | -17                           | -19                   | -19                  | -34                |
| <b>Prochloraz</b>           | <b>8.7</b>                  | -21                           | -31                   | -35                  | -48                |
| <b>Profenofos</b>           | <b>12.1</b>                 | -22                           | -29                   | -24                  | -57                |
| <b>Propamocarb</b>          | <b>1.1</b>                  | -18                           | -22                   | -24                  | -34                |
| <b>Propargite</b>           | <b>13.6</b>                 | -21                           | -31                   | -22                  | -26                |
| <b>Propiconazole</b>        | <b>10.5</b>                 | -9                            | -15                   | -14                  | -29                |
| <b>Propoxur</b>             | <b>7</b>                    | -16                           | -25                   | -27                  | -51                |
| <b>Propyzamide</b>          | <b>9.9</b>                  | -12                           | -15                   | -14                  | -22                |
| <b>Prothioconazole</b>      | <b>10.4</b>                 | -42                           | -47                   | -53                  | -72                |
| <b>Pymetrozine</b>          | <b>0.9</b>                  | -20                           | -31                   | -53                  | -60                |
| <b>Pyraclostrobin</b>       | <b>11.5</b>                 | -28                           | -25                   | -23                  | -51                |
| <b>Pyridaben</b>            | <b>13.9</b>                 | -22                           | -13                   | -1                   | -39                |
| <b>Pyrimethanil</b>         | <b>6.2</b>                  | -30                           | -31                   | -56                  | -64                |
| <b>Pyriproxyfen</b>         | <b>12.7</b>                 | -10                           | -17                   | -19                  | -65                |
| <b>Quinoxifen</b>           | <b>11.7</b>                 | -20                           | -28                   | -30                  | -64                |

| Orange          |                      |                        |                |               |             |
|-----------------|----------------------|------------------------|----------------|---------------|-------------|
| Pesticides      | Retention time (min) | Signal suppression (%) |                |               |             |
|                 |                      | 1: 20 Dilution         | 1: 10 Dilution | 1: 5 Dilution | No Dilution |
| Rotenone        | 10.4                 | -11                    | -20            | -20           | -49         |
| Spinosyn A      | 8.7                  | -65                    | -75            | -78           | -91         |
| Spinosyn D      | 9.2                  | -35                    | -32            | -30           | -44         |
| Spirodiclofen   | 14.3                 | -14                    | 14             | 2             | -57         |
| Spiromesifen    | 14.2                 | -38                    | -14            | 5             | -37         |
| Spiroxamine     | 7.7                  | -38                    | -45            | -52           | -71         |
| Tebuconazole    | 9.9                  | -8                     | -18            | -14           | -25         |
| Tebufenozide    | 10.9                 | 21                     | -25            | -3            | -23         |
| Tebufenpyrad    | 12.2                 | -31                    | -24            | -25           | -61         |
| Terbutylazine   | 9                    | -37                    | -44            | -53           | -76         |
| Tetraconazole   | 10                   | -13                    | -17            | -11           | -29         |
| Thiabendazole   | 1.3                  | -9                     | -30            | -59           | -55         |
| Thiacloprid     | 5.6                  | 7                      | 4              | 13            | -28         |
| Thiamethoxam    | 2.5                  | 12                     | 6              | 25            | 89          |
| Thiodicarb      | 6.9                  | -1                     | 7              | 33            | 8           |
| Triadimenol I   | 8.8                  | -3                     | 3              | -17           | -35         |
| Triadimenol II  | 9.1                  | -2                     | -10            | -16           | -17         |
| Triazophos      | 10.5                 | -3                     | -5             | -6            | -25         |
| Trichlorfon     | 3                    | 0                      | -12            | 16            | 18          |
| Trifloxystrobin | 12.3                 | -20                    | -25            | -22           | -50         |
| Triflumuron     | 11.1                 | -30                    | -29            | -28           | -60         |
| Triticonazole   | 9.1                  | -20                    | -21            | -20           | -40         |
| Zoxamide        | 11.4                 | -19                    | -22            | -17           | -36         |

| Leek               |                      |                        |                |               |             |
|--------------------|----------------------|------------------------|----------------|---------------|-------------|
| Pesticides         | Retention time (min) | Signal suppression (%) |                |               |             |
|                    |                      | 1: 20 Dilution         | 1: 10 Dilution | 1: 5 Dilution | No Dilution |
| Acephate           | 1.1                  | -5                     | -32            | -35           | -51         |
| Acetamiprid        | 4.5                  | 1                      | -15            | -25           | -51         |
| Aldicarb           | 5.8                  | -42                    | -65            | -75           | -86         |
| Aldicarb sulfone   | 1.8                  | 22                     | -5             | 4             | -7          |
| Aldicarb sulfoxide | 1.2                  | 8                      | -16            | -7            | -17         |
| Azoxystrobin       | 9.7                  | -14                    | -18            | -16           | -46         |
| Bitertanol         | 10.2                 | -28                    | -34            | -31           | -43         |
| Boscalid           | 9.9                  | -100                   | -100           | -100          | -100        |
| Bromuconazole I    | 9.3                  | -23                    | -27            | -31           | -57         |
| Bromuconazole II   | 9.8                  | -19                    | -26            | -28           | -45         |

| Leek                      |                      |                        |                |               |             |
|---------------------------|----------------------|------------------------|----------------|---------------|-------------|
| Pesticides                | Retention time (min) | Signal suppression (%) |                |               |             |
|                           |                      | 1: 20 Dilution         | 1: 10 Dilution | 1: 5 Dilution | No Dilution |
| Bupirimate                | 8.4                  | -38                    | -52            | -57           | -75         |
| Buprofezin                | 9.9                  | -17                    | -23            | -19           | -34         |
| Carbaryl                  | 7.5                  | -56                    | -74            | -79           | -92         |
| Carbendazim               | 1.2                  | -5                     | -19            | -20           | -30         |
| Carbofuran                | 7.2                  | -45                    | -63            | -71           | -84         |
| Chlorantraniliprole       | 8.7                  | -22                    | -39            | -46           | -71         |
| Chlorfenvinphos           | 10.9                 | -15                    | -17            | -19           | -43         |
| Chlorpyrifos              | 13.1                 | -21                    | -41            | -37           | -52         |
| Clofentezine              | 11.5                 | -10                    | -17            | -28           | -55         |
| Clothianidin              | 3.5                  | 0                      | -17            | -11           | -28         |
| Cyproconazole             | 9.1                  | -16                    | -19            | -22           | -47         |
| Cyprodinil                | 7.8                  | -35                    | -53            | -61           | -80         |
| Cyromazine                | 0.9                  | 4                      | 26             | 14            | -2          |
| Demeton-S-methylsulfone   | 2.3                  | 3                      | -13            | 0             | 8           |
| Demeton-S-methylsulfoxide | 1.5                  | 19                     | 2              | 31            | -2          |
| Diazinon                  | 11.4                 | -23                    | -34            | -40           | -59         |
| Dichlorvos                | 6.6                  | -28                    | -25            | -35           | -49         |
| Dicrotophos               | 2                    | -1                     | -16            | -8            | -3          |
| Diethofencarb             | 9.3                  | -42                    | -50            | -55           | -80         |
| Difenoconazole            | 10.9                 | -30                    | -36            | -38           | -35         |
| Diffubenzuron             | 10.2                 | -7                     | -57            | -47           | -68         |
| Dimethoate                | 4.4                  | -5                     | -14            | -12           | -37         |
| Dimethomorph I            | 8.6                  | 7                      | -7             | -14           | -48         |
| Dimethomorph II           | 8.9                  | 11                     | -5             | -16           | -49         |
| Diniconazole              | 10.5                 | -16                    | -27            | -30           | -40         |
| Dodine                    | 8.8                  | 17                     | -48            | -43           | -69         |
| Epoxiconazole             | 9.6                  | -22                    | -29            | -29           | -43         |
| Ethion                    | 13.4                 | -14                    | -41            | -34           | -49         |
| Ethirimol                 | 2.5                  | -13                    | -26            | -21           | -24         |
| Ethoprophos               | 9.8                  | -19                    | -24            | -36           | -59         |
| Etofenprox                | 10.9                 | -17                    | -42            | -53           | -72         |
| Fenamidone                | 9.8                  | -22                    | -31            | -35           | -51         |
| Fenamiphos                | 9.6                  | -24                    | -17            | -14           | -48         |
| Fenamiphos sulfone        | 7                    | -16                    | -19            | -19           | -32         |
| Fenamiphos sulfoxide      | 5.8                  | -12                    | -15            | -5            | -15         |
| Fenarimol                 | 9.4                  | -14                    | -25            | -33           | -55         |
| Fenazaquin                | 12.6                 | -17                    | -44            | -40           | -28         |
| Fenbuconazole             | 10.2                 | -30                    | -38            | -36           | -34         |
| Fenhexamid                | 9.8                  | -12                    | -25            | -25           | -63         |

| Leek                 |                      |                        |                |               |             |
|----------------------|----------------------|------------------------|----------------|---------------|-------------|
| Pesticides           | Retention time (min) | Signal suppression (%) |                |               |             |
|                      |                      | 1: 20 Dilution         | 1: 10 Dilution | 1: 5 Dilution | No Dilution |
| Fenoxycarb           | 7.8                  | -47                    | -61            | -69           | -83         |
| Fenpropimorph        | 7.7                  | -18                    | -29            | -22           | -53         |
| Fenpyroximate        | 13.2                 | -4                     | -11            | -17           | -3          |
| Fenthion sulfoxide   | 7.2                  | 17                     | 13             | -13           | -58         |
| Flonicamid           | 2.9                  | -13                    | -14            | -8            | -17         |
| Fluazifop            | 9.3                  | -23                    | -17            | -17           | -58         |
| Flufenoxuron         | 13                   | 10                     | 16             | 13            | 17          |
| Fluopyram            | 10.2                 | -20                    | -27            | -30           | -59         |
| Fluquinconazole      | 9.8                  | -29                    | -31            | -33           | -51         |
| Flusilazole          | 10.1                 | -21                    | -27            | -32           | -38         |
| Flutriafol           | 7.6                  | -11                    | -23            | -22           | -45         |
| Formetanate          | 1.1                  | -12                    | -14            | -22           | -31         |
| Fosthiazate          | 7.6                  | -22                    | -15            | -24           | -70         |
| Haloxfop             | 10.4                 | -19                    | -19            | -22           | -51         |
| Hexaconazole         | 10.2                 | -16                    | -24            | -17           | -40         |
| Hexythiazox          | 13.1                 | -13                    | -51            | -44           | -55         |
| Imazalil             | 6.5                  | -19                    | -28            | -33           | -44         |
| Imidacloprid         | 3.9                  | -1                     | -10            | 2             | -32         |
| Indoxacarb           | 12.2                 | -14                    | -32            | -33           | -25         |
| Iprodione            | 10.5                 | -20                    | -17            | -28           | -56         |
| Iprovalicarb         | 9.6                  | -21                    | -17            | -19           | -50         |
| Isocarbofos          | 9.1                  | -56                    | -77            | -87           | -94         |
| Isoprocarb           | 8.3                  | -36                    | -41            | -56           | -76         |
| Isoproturon          | 8.7                  | -39                    | -44            | -53           | -79         |
| Kresoxim-methyl      | 11.1                 | -23                    | -45            | -52           | -74         |
| Linuron              | 9.2                  | -35                    | -38            | -41           | -66         |
| Lufenuron            | 12.6                 | 7                      | -10            | -13           | 2           |
| Malathion            | 10.5                 | -20                    | -17            | -28           | -56         |
| Mandipropamid        | 9.9                  | -27                    | -26            | -29           | -57         |
| Mepanipyridin        | 9.8                  | -31                    | -44            | -53           | -73         |
| Metalaxyl            | 7.8                  | -21                    | -27            | -32           | -59         |
| Metconazole          | 10.3                 | -21                    | -30            | -30           | -42         |
| Methamidophos        | 1.1                  | 35                     | -10            | -35           | -24         |
| Methidathion         | 9.3                  | -63                    | -83            | -89           | -93         |
| Methiocarb           | 9.1                  | -36                    | -43            | -53           | -75         |
| Methiocarb sulfone   | 5.1                  | 3                      | 25             | 24            | -46         |
| Methiocarb sulfoxide | 2.9                  | -4                     | -10            | 27            | -5          |
| Methomyl             | 2.1                  | -7                     | -2             | 12            | -19         |
| Methoxyfenozide      | 10.3                 | -14                    | -22            | -23           | -57         |

| Leek                 |                      |                        |                |               |             |
|----------------------|----------------------|------------------------|----------------|---------------|-------------|
| Pesticides           | Retention time (min) | Signal suppression (%) |                |               |             |
|                      |                      | 1: 20 Dilution         | 1: 10 Dilution | 1: 5 Dilution | No Dilution |
| Metobromuron         | 8.2                  | -33                    | -44            | -48           | -72         |
| Monocrotophos        | 1.7                  | 7                      | -5             | 12            | -5          |
| Myclobutanil         | 9.7                  | -14                    | -22            | -20           | -41         |
| Nitenpyram           | 1.6                  | -22                    | -27            | -28           | -50         |
| Omethoate            | 1.2                  | 25                     | -4             | 3             | -25         |
| Oxadixyl             | 6.3                  | -31                    | -23            | -24           | -61         |
| Oxamyl               | 1.7                  | -20                    | -3             | 6             | -22         |
| Oxydemeton-methyl    | 1.5                  | 9                      | 2              | 11            | -2          |
| Paclobutrazol        | 8.9                  | -20                    | -28            | -30           | -55         |
| Penconazole          | 10.2                 | -18                    | -24            | -25           | -48         |
| Pencycuron           | 11.8                 | -25                    | -38            | -42           | -61         |
| Pendimethalin        | 13.1                 | -7                     | -45            | -40           | -45         |
| Phenthoate           | 11.5                 | -17                    | -43            | -46           | -74         |
| Phosalone            | 11.9                 | -16                    | -44            | -45           | -65         |
| Phosmet              | 9.5                  | -28                    | -28            | -17           | -55         |
| Pirimicarb           | 2.4                  | -10                    | -14            | -8            | -16         |
| Pirimicarb desmethyl | 1.4                  | 8                      | -13            | -5            | -31         |
| Pirimiphos-methyl    | 11.1                 | -24                    | -38            | -42           | -58         |
| Prochloraz           | 8.7                  | -30                    | -49            | -59           | -82         |
| Profenofos           | 12.1                 | -25                    | -43            | -44           | -59         |
| Propamocarb          | 1.1                  | -13                    | -20            | -17           | -24         |
| Propargite           | 13.6                 | -20                    | -47            | -35           | -51         |
| Propiconazole        | 10.5                 | -13                    | -23            | -19           | -39         |
| Propoxur             | 7                    | -41                    | -60            | -68           | -84         |
| Propyzamide          | 9.9                  | -11                    | -20            | -21           | -43         |
| Prothioconazole      | 10.4                 | -96                    | -92            | -87           | -87         |
| Pymetrozine          | 0.9                  | 26                     | 19             | -33           | -62         |
| Pyraclostrobin       | 11.5                 | -11                    | -26            | -34           | -63         |
| Pyridaben            | 13.9                 | -24                    | -40            | -26           | -20         |
| Pyrimethanil         | 6.2                  | -33                    | -47            | -49           | -73         |
| Pyriproxyfen         | 12.7                 | -13                    | -47            | -44           | -40         |
| Quinoxifen           | 11.7                 | -21                    | -45            | -43           | -41         |
| Rotenone             | 10.4                 | -25                    | -32            | -42           | -56         |
| Spinosyn A           | 8.7                  | -28                    | -45            | -53           | -74         |
| Spinosyn D           | 9.2                  | -20                    | -42            | -54           | -75         |
| Spirodiclofen        | 14.3                 | -11                    | -22            | -26           | -41         |
| Spiromesifen         | 14.2                 | -25                    | -31            | -18           | -46         |
| Spiroxamine          | 7.7                  | -21                    | -21            | -20           | -45         |
| Tebuconazole         | 9.9                  | -20                    | -24            | -20           | -34         |

| Leek            |                      |                        |                |               |             |
|-----------------|----------------------|------------------------|----------------|---------------|-------------|
| Pesticides      | Retention time (min) | Signal suppression (%) |                |               |             |
|                 |                      | 1: 20 Dilution         | 1: 10 Dilution | 1: 5 Dilution | No Dilution |
| Tebufenozide    | 10.9                 | 9                      | -7             | -18           | -54         |
| Tebufenpyrad    | 12.2                 | -6                     | -22            | -21           | -33         |
| Terbuthylazine  | 9                    | -29                    | -36            | -46           | -72         |
| Tetraconazole   | 10                   | -6                     | -12            | -16           | -45         |
| Thiabendazole   | 1.3                  | -5                     | -22            | -21           | -47         |
| Thiacloprid     | 5.6                  | -25                    | -47            | -57           | -72         |
| Thiamethoxam    | 2.5                  | -9                     | -27            | -24           | -30         |
| Thiodicarb      | 6.9                  | 15                     | 36             | 54            | -25         |
| Triadimenol I   | 8.8                  | -5                     | 6              | -21           | -43         |
| Triadimenol II  | 9.1                  | -8                     | -6             | -11           | -23         |
| Triazophos      | 10.5                 | -8                     | -11            | -19           | -57         |
| Trichlorfon     | 3                    | -1                     | -21            | -6            | -35         |
| Trifloxystrobin | 12.3                 | -27                    | -46            | -52           | -63         |
| Triflumuron     | 11.1                 | -29                    | -43            | -43           | -52         |
| Triticonazole   | 9.1                  | -20                    | -24            | -26           | -54         |
| Zoxamide        | 11.4                 | -14                    | -25            | -34           | -59         |

| Broccoli           |                      |                        |                |               |             |
|--------------------|----------------------|------------------------|----------------|---------------|-------------|
| Pesticides         | Retention time (min) | Signal suppression (%) |                |               |             |
|                    |                      | 1: 20 Dilution         | 1: 10 Dilution | 1: 5 Dilution | No Dilution |
| Acephate           | 1.1                  | 11                     | 10             | 14            | 10          |
| Acetamiprid        | 4.5                  | -17                    | -20            | -24           | -25         |
| Aldicarb           | 5.8                  | 8                      | 1              | -11           | -45         |
| Aldicarb sulfone   | 1.8                  | -4                     | -1             | -7            | -2          |
| Aldicarb sulfoxide | 1.2                  | -10                    | -14            | -23           | -49         |
| Azoxystrobin       | 9.7                  | -20                    | -5             | -5            | -5          |
| Bitertanol         | 10.2                 | -20                    | -9             | -14           | -49         |
| Boscalid           | 9.9                  | 0                      | 1              | -15           | -38         |
| Bromuconazole I    | 9.3                  | -20                    | -7             | -13           | -45         |
| Bromuconazole II   | 9.8                  | -17                    | -12            | -18           | -51         |
| Bupirimate         | 8.4                  | -9                     | -4             | -12           | -43         |
| Buprofezin         | 9.9                  | 18                     | 3              | 19            | -6          |
| Carbaryl           | 7.5                  | 1                      | -1             | -6            | -28         |
| Carbendazim        | 1.2                  | 4                      | 14             | -15           | -37         |
| Carbofuran         | 7.2                  | -36                    | -43            | -56           | -62         |

| <b>Broccoli</b>           |                             |                               |                       |                      |                    |
|---------------------------|-----------------------------|-------------------------------|-----------------------|----------------------|--------------------|
| <b>Pesticides</b>         | <b>Retention time (min)</b> | <b>Signal suppression (%)</b> |                       |                      |                    |
|                           |                             | <b>1: 20 Dilution</b>         | <b>1: 10 Dilution</b> | <b>1: 5 Dilution</b> | <b>No Dilution</b> |
| Chlorantraniliprole       | 8.7                         | -12                           | -9                    | -16                  | -64                |
| Chlorfenvinphos           | 10.9                        | -20                           | -8                    | -6                   | -27                |
| Chlorpyrifos              | 13.1                        | 2                             | -15                   | -12                  | -59                |
| Clofentezine              | 11.5                        | -9                            | -17                   | -32                  | -77                |
| Clothianidin              | 3.5                         | -4                            | -1                    | -10                  | -16                |
| Cyproconazole             | 9.1                         | -16                           | -6                    | -9                   | -30                |
| Cyprodinil                | 7.8                         | -20                           | -17                   | -24                  | -63                |
| Cyromazine                | 0.9                         | 7                             | 7                     | -8                   | -86                |
| Demeton-S-methylsulfone   | 2.3                         | 25                            | 32                    | 35                   | 29                 |
| Demeton-S-methylsulfoxide | 1.5                         | -8                            | -4                    | 1                    | 15                 |
| Diazinon                  | 11.4                        | -32                           | -18                   | -23                  | -62                |
| Dichlorvos                | 6.6                         | -4                            | -5                    | -26                  | -10                |
| Dicrotophos               | 2                           | -8                            | -3                    | -3                   | 12                 |
| Diethofencarb             | 9.3                         | -16                           | 9                     | -3                   | -26                |
| Difenoconazole            | 10.9                        | -22                           | -11                   | -15                  | -55                |
| Diflubenzuron             | 10.2                        | -27                           | -17                   | -25                  | -55                |
| Dimethoate                | 4.4                         | -10                           | -9                    | -15                  | -8                 |
| Dimethomorph I            | 8.6                         | -21                           | -8                    | -10                  | -57                |
| Dimethomorph II           | 8.9                         | -14                           | 0                     | 0                    | 0                  |
| Diniconazole              | 10.5                        | -21                           | -13                   | -21                  | -54                |
| Dodine                    | 8.8                         | 4                             | 6                     | 14                   | -47                |
| Epoxiconazole             | 9.6                         | -14                           | -11                   | -14                  | -46                |
| Ethion                    | 13.4                        | 12                            | 16                    | 16                   | -39                |
| Ethirimol                 | 2.5                         | -1                            | -3                    | -14                  | -9                 |
| Ethoprophos               | 9.8                         | -16                           | -8                    | -13                  | -18                |
| Etofenprox                | 10.9                        | -10                           | -17                   | -23                  | -23                |
| Fenamidone                | 9.8                         | -21                           | -8                    | -12                  | -30                |
| Fenamiphos                | 9.6                         | -27                           | -9                    | -1                   | -21                |
| Fenamiphos sulfone        | 7                           | -10                           | -7                    | -3                   | 23                 |
| Fenamiphos sulfoxide      | 5.8                         | -13                           | -7                    | -9                   | 46                 |
| Fenarimol                 | 9.4                         | -17                           | -9                    | -14                  | -45                |
| Fenazaquin                | 12.6                        | 17                            | 5                     | 25                   | -29                |
| Fenbuconazole             | 10.2                        | -11                           | -10                   | -21                  | -51                |
| Fenhexamid                | 9.8                         | -17                           | -14                   | -11                  | -34                |
| Fenoxycarb                | 7.8                         | 7                             | 17                    | -1                   | -11                |
| Fenpropimorph             | 7.7                         | 17                            | 23                    | 30                   | -11                |
| Fenpyroximate             | 13.2                        | 2                             | 3                     | 10                   | 16                 |
| Fenthion sulfoxide        | 7.2                         | 3                             | 22                    | 22                   | 28                 |
| Flonicamid                | 2.9                         | -3                            | -1                    | -3                   | -3                 |



| <b>Broccoli</b>             |                             |                               |                       |                      |                    |
|-----------------------------|-----------------------------|-------------------------------|-----------------------|----------------------|--------------------|
| <b>Pesticides</b>           | <b>Retention time (min)</b> | <b>Signal suppression (%)</b> |                       |                      |                    |
|                             |                             | <b>1: 20 Dilution</b>         | <b>1: 10 Dilution</b> | <b>1: 5 Dilution</b> | <b>No Dilution</b> |
| <b>Fluazifop</b>            | <b>9.3</b>                  | -8                            | -1                    | -13                  | -24                |
| <b>Flufenoxuron</b>         | <b>13</b>                   | 2                             | 6                     | 4                    | 13                 |
| <b>Fluopyram</b>            | <b>10.2</b>                 | -16                           | -9                    | -11                  | -26                |
| <b>Fluquinconazole</b>      | <b>9.8</b>                  | -18                           | -8                    | -15                  | -48                |
| <b>Flusilazole</b>          | <b>10.1</b>                 | -18                           | -12                   | -21                  | -48                |
| <b>Flutriafol</b>           | <b>7.6</b>                  | -8                            | 4                     | 3                    | -12                |
| <b>Formetanate</b>          | <b>1.1</b>                  | -8                            | 12                    | 6                    | -36                |
| <b>Fosthiazate</b>          | <b>7.6</b>                  | -13                           | 2                     | 1                    | 21                 |
| <b>Haloxypop</b>            | <b>10.4</b>                 | -17                           | -8                    | -20                  | -46                |
| <b>Hexaconazole</b>         | <b>10.2</b>                 | -16                           | -8                    | -15                  | -49                |
| <b>Hexythiazox</b>          | <b>13.1</b>                 | 2                             | -8                    | -11                  | -57                |
| <b>Imazalil</b>             | <b>6.5</b>                  | 2                             | 2                     | -6                   | -7                 |
| <b>Imidacloprid</b>         | <b>3.9</b>                  | -8                            | -5                    | -6                   | -3                 |
| <b>Indoxacarb</b>           | <b>12.2</b>                 | 14                            | 15                    | 11                   | 2                  |
| <b>Iprodione</b>            | <b>10.5</b>                 | -15                           | -6                    | -11                  | -21                |
| <b>Iprovalicarb</b>         | <b>9.6</b>                  | -15                           | -2                    | 2                    | -10                |
| <b>Isocarbofos</b>          | <b>9.1</b>                  | 20                            | -14                   | -27                  | -65                |
| <b>Isoprocarb</b>           | <b>8.3</b>                  | -1                            | 13                    | -8                   | -22                |
| <b>Isoproturon</b>          | <b>8.7</b>                  | -21                           | -32                   | -35                  | -49                |
| <b>Kresoxim-methyl</b>      | <b>11.1</b>                 | -10                           | -16                   | -22                  | -52                |
| <b>Linuron</b>              | <b>9.2</b>                  | -8                            | -11                   | -12                  | -35                |
| <b>Lufenuron</b>            | <b>12.6</b>                 | -8                            | -12                   | -32                  | -35                |
| <b>Malathion</b>            | <b>10.5</b>                 | -15                           | -6                    | -11                  | -21                |
| <b>Mandipropamid</b>        | <b>9.9</b>                  | -22                           | -10                   | -14                  | -34                |
| <b>Mepanipyrin</b>          | <b>9.8</b>                  | -25                           | 0                     | -18                  | -51                |
| <b>Metalaxyl</b>            | <b>7.8</b>                  | -3                            | 2                     | 5                    | 27                 |
| <b>Metconazole</b>          | <b>10.3</b>                 | -19                           | -13                   | -16                  | -46                |
| <b>Methamidophos</b>        | <b>1.1</b>                  | -3                            | -14                   | -16                  | -12                |
| <b>Methidathion</b>         | <b>9.3</b>                  | 4                             | -12                   | -35                  | -69                |
| <b>Methiocarb</b>           | <b>9.1</b>                  | -3                            | -9                    | -10                  | -41                |
| <b>Methiocarb sulfone</b>   | <b>5.1</b>                  | 26                            | 23                    | 18                   | 10                 |
| <b>Methiocarb sulfoxide</b> | <b>2.9</b>                  | -4                            | 15                    | 79                   | 21                 |
| <b>Methomyl</b>             | <b>2.1</b>                  | -2                            | 4                     | -4                   | -5                 |
| <b>Methoxyfenozide</b>      | <b>10.3</b>                 | -15                           | -4                    | -8                   | -25                |
| <b>Metobromuron</b>         | <b>8.2</b>                  | -10                           | -12                   | -24                  | -47                |
| <b>Monocrotophos</b>        | <b>1.7</b>                  | 20                            | 25                    | 18                   | 23                 |
| <b>Myclobutanil</b>         | <b>9.7</b>                  | -23                           | -6                    | -11                  | -36                |
| <b>Nitenpyram</b>           | <b>1.6</b>                  | -5                            | -3                    | -20                  | -30                |
| <b>Omethoate</b>            | <b>1.2</b>                  | -10                           | -19                   | -28                  | -26                |

| <b>Broccoli</b>             |                             |                               |                       |                      |                    |
|-----------------------------|-----------------------------|-------------------------------|-----------------------|----------------------|--------------------|
| <b>Pesticides</b>           | <b>Retention time (min)</b> | <b>Signal suppression (%)</b> |                       |                      |                    |
|                             |                             | <b>1: 20 Dilution</b>         | <b>1: 10 Dilution</b> | <b>1: 5 Dilution</b> | <b>No Dilution</b> |
| <b>Oxadixyl</b>             | <b>6.3</b>                  | -12                           | 3                     | 11                   | 41                 |
| <b>Oxamyl</b>               | <b>1.7</b>                  | -5                            | 4                     | -5                   | -28                |
| <b>Oxydemeton-methyl</b>    | <b>1.5</b>                  | -8                            | -4                    | 1                    | 15                 |
| <b>Paclobutrazol</b>        | <b>8.9</b>                  | -14                           | -2                    | -8                   | -24                |
| <b>Penconazole</b>          | <b>10.2</b>                 | -21                           | -8                    | -20                  | -51                |
| <b>Pencycuron</b>           | <b>11.8</b>                 | -16                           | -15                   | -23                  | -52                |
| <b>Pendimethalin</b>        | <b>13.1</b>                 | 23                            | 2                     | 6                    | -56                |
| <b>Phenthoate</b>           | <b>11.5</b>                 | -20                           | -27                   | -30                  | -63                |
| <b>Phosalone</b>            | <b>11.9</b>                 | -43                           | -50                   | -54                  | -83                |
| <b>Phosmet</b>              | <b>9.5</b>                  | -17                           | -1                    | 23                   | -35                |
| <b>Pirimicarb</b>           | <b>2.4</b>                  | 12                            | 5                     | -5                   | -13                |
| <b>Pirimicarb desmethyl</b> | <b>1.4</b>                  | -4                            | -22                   | -17                  | -23                |
| <b>Pirimiphos-methyl</b>    | <b>11.1</b>                 | -14                           | -10                   | -13                  | -50                |
| <b>Prochloraz</b>           | <b>8.7</b>                  | -13                           | -10                   | -13                  | -63                |
| <b>Profenofos</b>           | <b>12.1</b>                 | -23                           | -22                   | -27                  | -69                |
| <b>Propamocarb</b>          | <b>1.1</b>                  | -21                           | -28                   | -47                  | -62                |
| <b>Propargite</b>           | <b>13.6</b>                 | 2                             | 3                     | 8                    | -32                |
| <b>Propiconazole</b>        | <b>10.5</b>                 | -18                           | -3                    | -20                  | -51                |
| <b>Propoxur</b>             | <b>7</b>                    | 1                             | 7                     | -2                   | -20                |
| <b>Propyzamide</b>          | <b>9.9</b>                  | -13                           | -9                    | -15                  | -33                |
| <b>Prothioconazole</b>      | <b>10.4</b>                 | -96                           | -92                   | -96                  | -99                |
| <b>Pymetrozine</b>          | <b>0.9</b>                  | 23                            | -23                   | -34                  | -60                |
| <b>Pyraclostrobin</b>       | <b>11.5</b>                 | -1                            | -5                    | -13                  | -59                |
| <b>Pyridaben</b>            | <b>13.9</b>                 | 11                            | 14                    | 17                   | -8                 |
| <b>Pyrimethanil</b>         | <b>6.2</b>                  | 1                             | -2                    | -13                  | -45                |
| <b>Pyriproxyfen</b>         | <b>12.7</b>                 | 1                             | -13                   | -5                   | -59                |
| <b>Quinoxifen</b>           | <b>11.7</b>                 | -5                            | -16                   | -16                  | -58                |
| <b>Rotenone</b>             | <b>10.4</b>                 | -18                           | -13                   | -11                  | -46                |
| <b>Spinosyn A</b>           | <b>8.7</b>                  | 9                             | 15                    | 6                    | -8                 |
| <b>Spinosyn D</b>           | <b>9.2</b>                  | 7                             | 12                    | 6                    | 2                  |
| <b>Spirodiclofen</b>        | <b>14.3</b>                 | 3                             | 11                    | 4                    | -21                |
| <b>Spiromesifen</b>         | <b>14.2</b>                 | 6                             | 14                    | 3                    | 10                 |
| <b>Spiroxamine</b>          | <b>7.7</b>                  | -8                            | 13                    | 4                    | -8                 |
| <b>Tebuconazole</b>         | <b>9.9</b>                  | -21                           | -12                   | -14                  | -41                |
| <b>Tebufenozide</b>         | <b>10.9</b>                 | -32                           | -20                   | -7                   | -38                |
| <b>Tebufenpyrad</b>         | <b>12.2</b>                 | -9                            | -6                    | -7                   | -51                |
| <b>Terbuthylazine</b>       | <b>9</b>                    | -6                            | -12                   | -23                  | -52                |
| <b>Tetraconazole</b>        | <b>10</b>                   | -21                           | -12                   | -17                  | -51                |
| <b>Thiabendazole</b>        | <b>1.3</b>                  | -9                            | -13                   | -25                  | -52                |

| <b>Broccoli</b>        |                                 |                               |                           |                          |                        |
|------------------------|---------------------------------|-------------------------------|---------------------------|--------------------------|------------------------|
| <b>Pesticides</b>      | <b>Retention time<br/>(min)</b> | <b>Signal suppression (%)</b> |                           |                          |                        |
|                        |                                 | <b>1: 20<br/>Dilution</b>     | <b>1: 10<br/>Dilution</b> | <b>1: 5<br/>Dilution</b> | <b>No<br/>Dilution</b> |
| <b>Thiacloprid</b>     | <b>5.6</b>                      | -7                            | -3                        | -11                      | -19                    |
| <b>Thiamethoxam</b>    | <b>2.5</b>                      | -6                            | -9                        | -11                      | -2                     |
| <b>Thiodicarb</b>      | <b>6.9</b>                      | -12                           | 4                         | 6                        | 35                     |
| <b>Triadimenol I</b>   | <b>8.8</b>                      | 5                             | 16                        | 5                        | -22                    |
| <b>Triadimenol II</b>  | <b>9.1</b>                      | -2                            | -3                        | -7                       | -33                    |
| <b>Triazophos</b>      | <b>10.5</b>                     | -26                           | -13                       | -18                      | -38                    |
| <b>Trichlorfon</b>     | <b>3</b>                        | 0                             | 20                        | 33                       | 2                      |
| <b>Trifloxystrobin</b> | <b>12.3</b>                     | -4                            | -4                        | -2                       | -37                    |
| <b>Triflumuron</b>     | <b>11.1</b>                     | -19                           | -18                       | -26                      | -59                    |
| <b>Triticonazole</b>   | <b>9.1</b>                      | -17                           | -3                        | -10                      | -29                    |
| <b>Zoxamide</b>        | <b>11.4</b>                     | -14                           | -7                        | -9                       | -44                    |

**Figure S1. Matrix fingerprinting of the 23 studied matrices analyzed using LC-TOF-MS (absolute height  $\geq 10,000$  counts). The x-axis represents the retention time (min) and the y-axis the mass.**

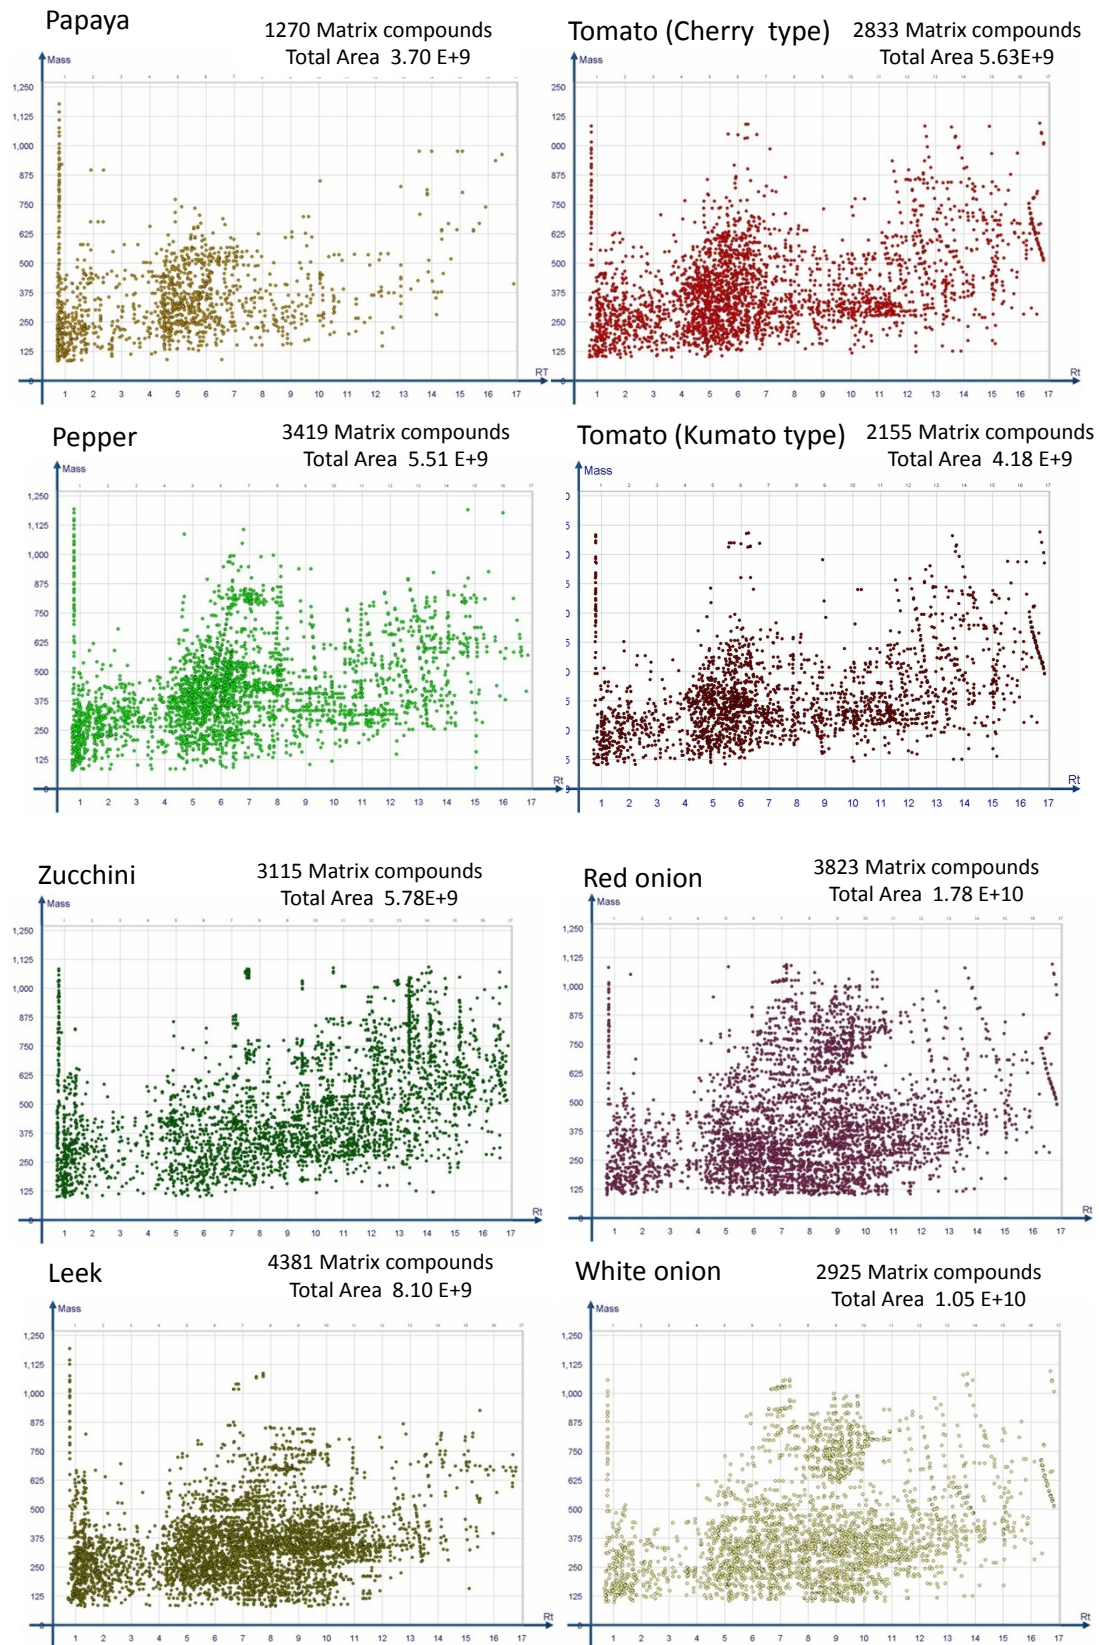

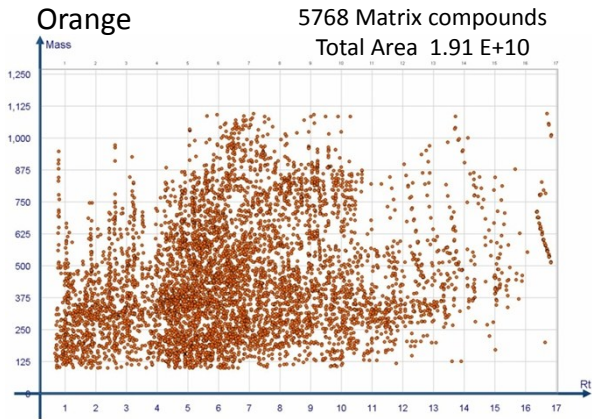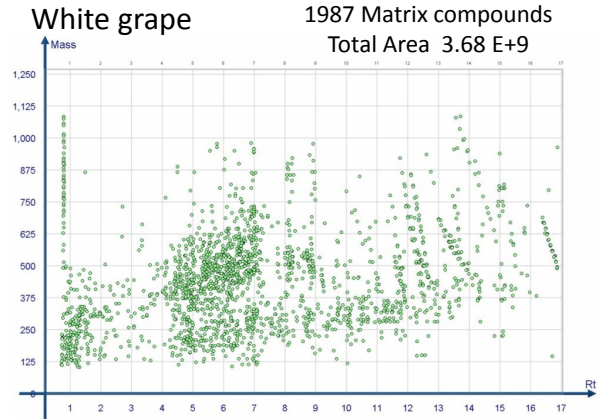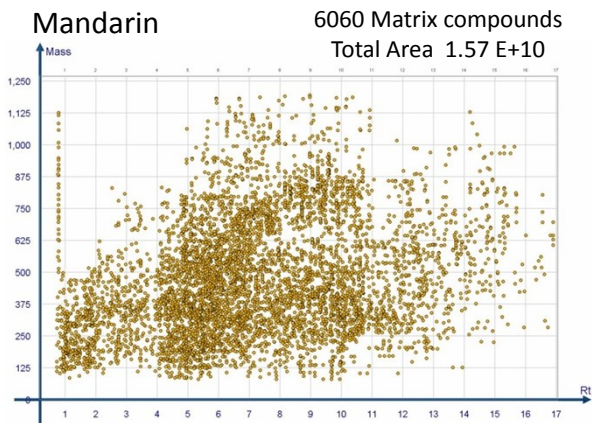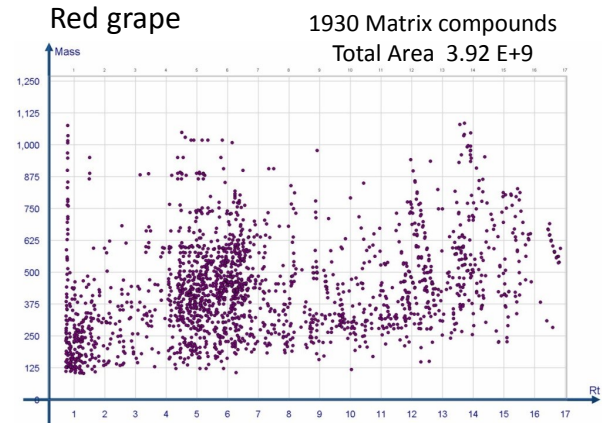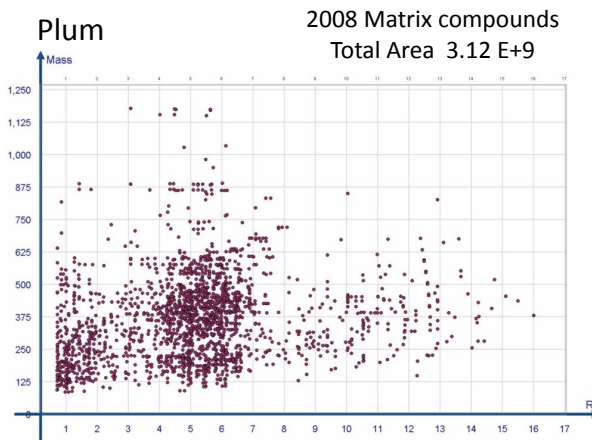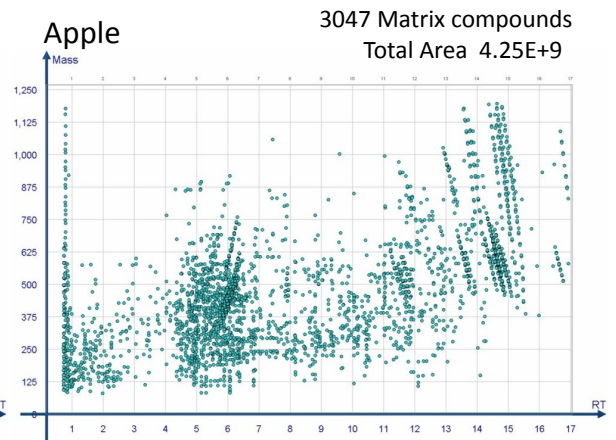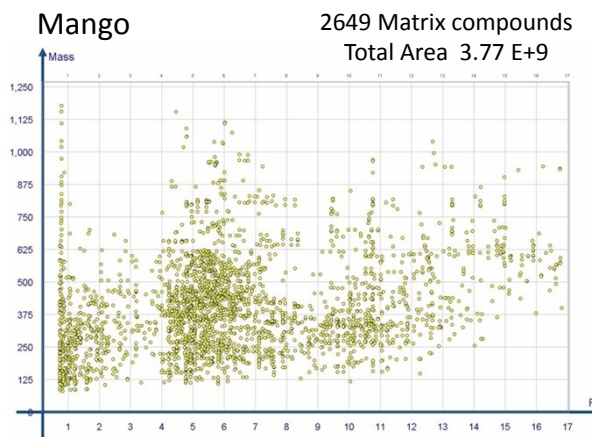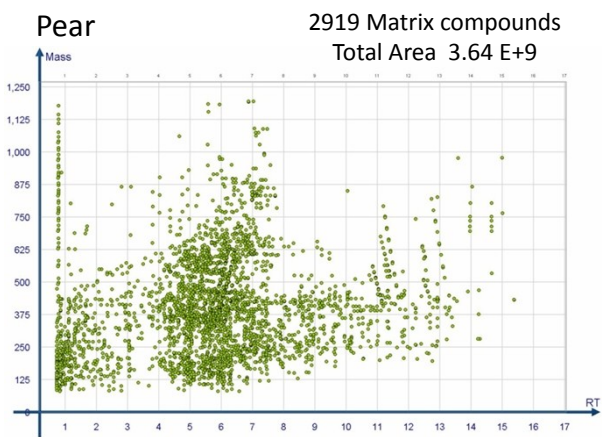

**Aubergine**

1400 Matrix compounds  
Total Area 3.00 E+9

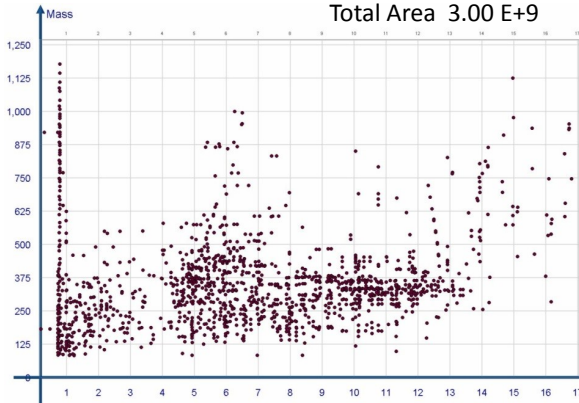

**Asparagus**

2277 Matrix compounds  
Total Area 3.33 E+9

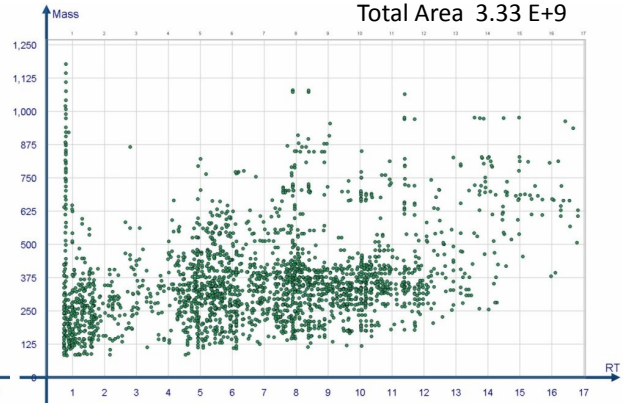

**Broccoli**

3397 Matrix compounds  
Total Area 4.58E+9

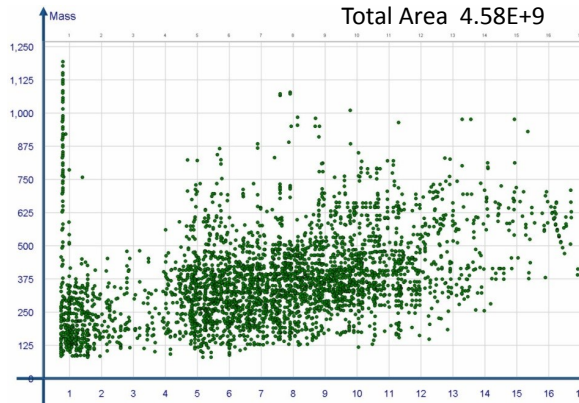

**Green bean**

2398 Matrix compounds  
Total Area 3.92 E+9

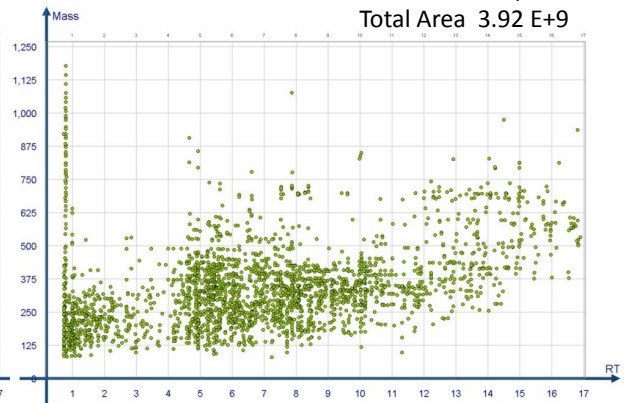

**Black tea**

4910 Matrix compounds  
Total Area 1.18E+10

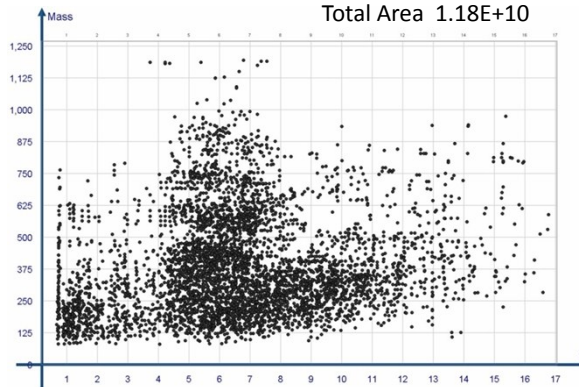

**Green tea**

5793 Matrix compounds  
Total Area 1.32E+10

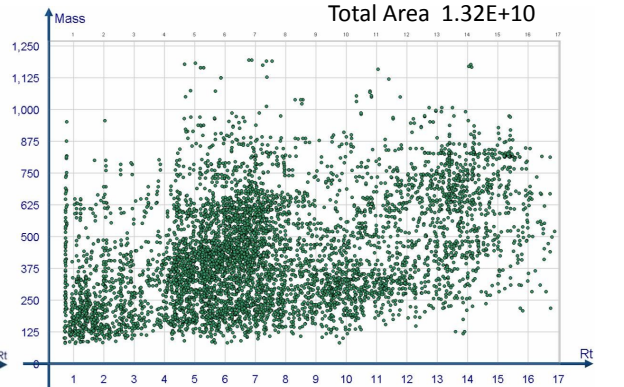

**Red tea**

4504 Matrix compounds  
Total Area 1.18E+10

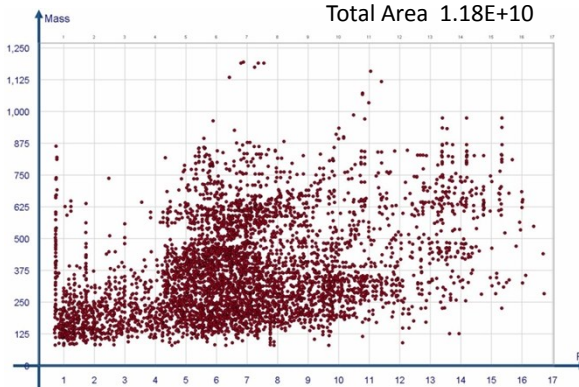

**Chamomile**

3784 Matrix compounds  
Total Area 1.36E+10

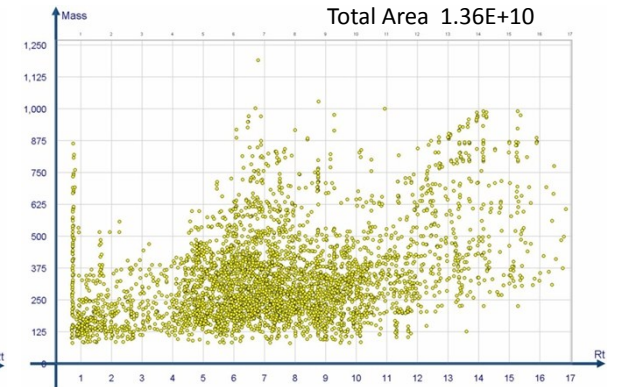

### Lettuce

1586 Matrix compounds  
Total Area 3.70 E+9

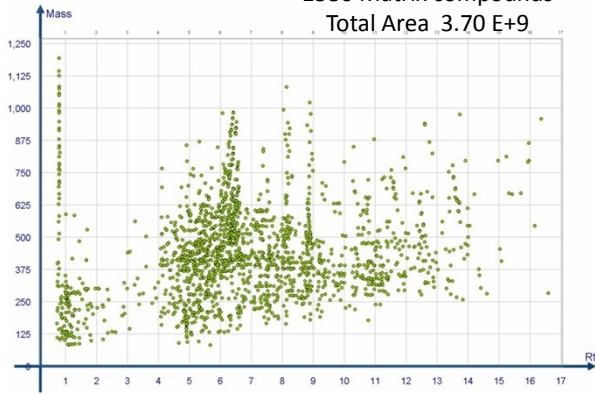

### Cucumber

2258 Matrix compounds  
Total Area 5.73 E+9

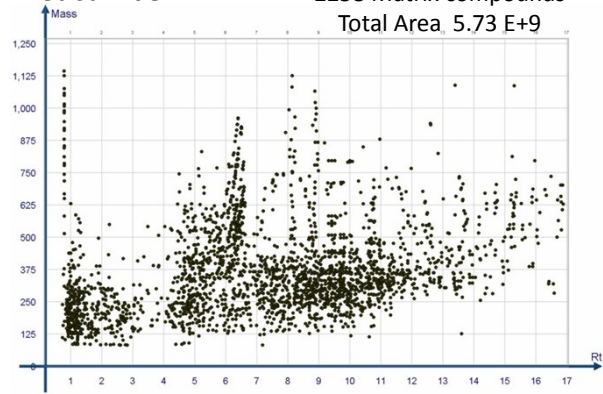

### Grapefruit

5064 Matrix compounds  
Total Area 7.20 E+9

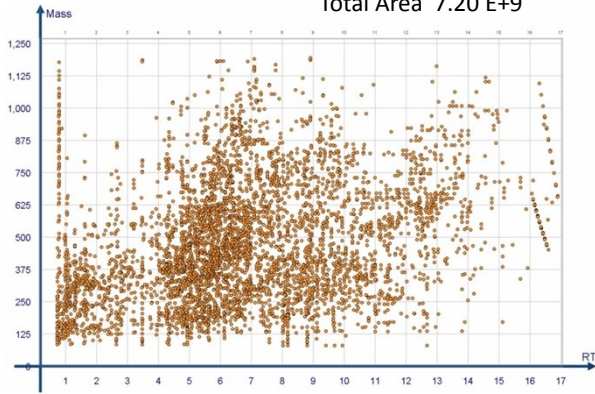

Supplement: c6ay00436a1.pdf [file c6ay00436a1.pdf]
